# Supplementary material for: Prison cell spatial density and infectious and communicable diseases: a systematic review
Source: PubMed Central journal article supplement — BMJ Open. 2019 Jul 23;9(7):e026806. doi: 10.1136/bmjopen-2018-026806 (PMC6661645; doi:10.1136/bmjopen-2018-026806), 2019-07-23
Supplement: bmjopen-2018-026806.draft_revisions.pdf [file bmjopen-2018-026806.draft_revisions.pdf]

# BMJ Open

BMJ Open is committed to open peer review. As part of this commitment we make the peer review history of every article we publish publicly available.

When an article is published we post the peer reviewers' comments and the authors' responses online. We also post the versions of the paper that were used during peer review. These are the versions that the peer review comments apply to.

The versions of the paper that follow are the versions that were submitted during the peer review process. They are not the versions of record or the final published versions. They should not be cited or distributed as the published version of this manuscript.

BMJ Open is an open access journal and the full, final, typeset and author-corrected version of record of the manuscript is available on our site with no access controls, subscription charges or pay-per-view fees (<http://bmjopen.bmj.com>).

If you have any questions on BMJ Open's open peer review process please email [info.bmjopen@bmj.com](mailto:info.bmjopen@bmj.com)

# BMJ Open

## Prison cell spatial density and infectious and communicable diseases: a systematic review

|                               |                                                                                                                                                                                                                                                                                                                                                                                                                                    |
|-------------------------------|------------------------------------------------------------------------------------------------------------------------------------------------------------------------------------------------------------------------------------------------------------------------------------------------------------------------------------------------------------------------------------------------------------------------------------|
| Journal:                      | <i>BMJ Open</i>                                                                                                                                                                                                                                                                                                                                                                                                                    |
| Manuscript ID                 | bmjopen-2018-026806                                                                                                                                                                                                                                                                                                                                                                                                                |
| Article Type:                 | Research                                                                                                                                                                                                                                                                                                                                                                                                                           |
| Date Submitted by the Author: | 05-Oct-2018                                                                                                                                                                                                                                                                                                                                                                                                                        |
| Complete List of Authors:     | Simpson, Paul; University of New South Wales - Randwick Campus, Kirby Institute<br>Simpson, Melanie; University of New South Wales - Randwick Campus, Kirby Institute<br>Adily, Armita; University of New South Wales - Randwick Campus, Kirby Institute<br>Grant, Luke; New South Wales Department of Juvenile Justice, Corrective Services NSW<br>Butler, Tony; University of New South Wales - Randwick Campus, Kirby Institute |
| Keywords:                     | Communicable Diseases, Public health < INFECTIOUS DISEASES, Prisons, Prisoners, Crowding, Spatial Density                                                                                                                                                                                                                                                                                                                          |
|                               |                                                                                                                                                                                                                                                                                                                                                                                                                                    |

SCHOLARONE™  
Manuscripts

1  
2  
3 **Prison cell spatial density and infectious and communicable diseases: a systematic**  
4 **review**  
5

6  
7  
8 Paul L Simpson, Melanie Simpson, Armita Adily, Luke Grant, Tony G Butler  
9

10  
11 Kirby Institute, Wallace Wurth Building UNSW Sydney, 2052, Australia, Paul L Simpson  
12 research fellow Kirby Institute, Wallace Wurth Building UNSW Sydney, 2052, Australia,  
13 Melanie Simpson research associate Kirby Institute, Wallace Wurth Building UNSW Sydney,  
14 2052, Australia, Armita Adily research associate Corrective Services New South Wales, Henry  
15 Deane Building, 20 Lee Street, Sydney, 2000, Australia Luke Grant assistant commissioner  
16 Kirby Institute, Wallace Wurth Building UNSW Sydney, 2052, Australia, Tony G Butler  
17 professor  
18  
19

20  
21  
22 Correspondence to: PL Simpson [psimpson@kirby.unsw.edu.au](mailto:psimpson@kirby.unsw.edu.au)  
23  
24

25 Word count: 4547  
26  
27  
28  
29  
30  
31  
32  
33  
34  
35  
36  
37  
38  
39  
40  
41  
42  
43  
44  
45  
46  
47  
48  
49  
50  
51  
52  
53  
54  
55  
56  
57  
58  
59  
60

## Prison cell spatial density and infectious and communicable diseases: a systematic review

**Objective:** To summarise the extent and quality of evidence on the association between prison cell spatial density (a measure of crowding) and infectious and communicable diseases transmission.

**Design:** Systematic review.

**Data sources:** Embase, PubMed, Medline, Scopus, Web of Science, PsycInfo, PsycExtra, Proquest Databases, Proquest Dissertations and Theses Global, Index to Legal Periodicals, Informit Online, Cochrane Library, Criminal Justice Abstracts and ICONDA.

**Study selection:** Studies that reported on the association between prison cell spatial density (measured in square feet or square metres of cell floor area per person) and infectious and communicable diseases in juvenile and adult populations incarcerated in a correctional facility.

**Review methods:** A review protocol was developed in consultation with an advisory panel. Two reviewers independently extracted data and used the Australian National Health and Medical Research Council's (NHMRC) checklist to critically appraise individual studies. An assessment of the overall body of the evidence was conducted using the NHMRC's Evidence Scale and Statement Form. A draft report was peer-reviewed by an independent researcher.

**Findings:** A total of 3,532 articles were initially identified with six included in the review from the United States (1980s), Pakistan (2003) and Nigeria (2012, 2013). Infectious and communicable disease outcomes included pneumococcal disease/acute pneumonia, mycobacterium tuberculosis, infectious skin conditions, and contagious disease reporting to the prison clinic. Five articles reported statistically significant associations but were countered by associations possibly being explained by chance, bias or confounding factors. Heterogeneity prevented meta-analysis.

**Conclusion:** Overall, the body of evidence provides some support for an association, but care should be taken in the interpretation and transferability of the findings. Future research and policy responses should adequately consider prospective mediating factors implicated in associations between cell spatial density and health effects.

**Key words:** Communicable Diseases; Infectious Diseases; Prisons; Prisoners; Crowding; Spatial Density

### Strengths and limitations of this study

- This is the first systematic review of prison cell spatial density (a measure of crowding) and infectious and communicable diseases.
- This review provides some evidence of an association between prison cell spatial density and infectious and communicable diseases but the quality of the studies was assessed as poor.
- The findings of the review indicate that future research and policy responses should adequately consider prospective mediating factors implicated in associations between cell spatial density and health effects.
- This review was limited by the small number of studies and the heterogeneity of study design.

## Introduction

Globally, the number of prisoners is increasing. Two percent above world population growth,<sup>1</sup> since the year 2000 the world's prisoner population has grown by approximately 20%, imposing a significant financial burden on society and having profound social and health consequences.<sup>2</sup> More than 11 million people are held in penal institutions globally, either as remand (pre-trial detainees) or convicted prisoners. Currently, seventeen countries in the world have an incarceration rate of more than 400 per 100,000 population in prison. The United States (US) is the largest incarcerator, accounting for approximately 25% of the world's prisoners with an incarceration rate of 698 per 100,000 population.<sup>3</sup>

A rising prison population without a corresponding expansion of infrastructure has raised health concerns in many countries over prison crowding,<sup>3</sup> making prison cell size a key public health issue. For example, in the Australian state of New South Wales (NSW), prison cell size as a public health issue emerged in recent times with the publication of the Inspector of Custodial Services' report Full House: the growth of the inmate population in NSW, the increase in the prisoner population, and the issue that a significant number of prison cells did not meet public health regulations on the minimum floor area requirements per prisoner. Historically, Corrective Services NSW had been exempted from such regulation provided a range of conditions imposed by the NSW Ministry of Health were met. In 2012, the Ministry required the NSW Department of Justice, Corrective Services to engage an independent [from Corrective Services] group to review the international literature on prison cell crowding and adverse health effects, a review of the international cell size guidelines, and a review of health surveillance data to advise the Ministers for Health and Justice.

Close physical proximity in confined spaces such as in prisons has been reported to be associated with an increased risk of infectious and communicable disease transmission including, mycobacterium tuberculosis, scabies, pneumococcus, meningococcus and

1  
2  
3 influenza.<sup>5-7</sup> Rates of infectious diseases in prisons, particularly blood-borne viral infections  
4  
5 (HIV and viral hepatitis) and airborne infections such as mycobacterium tuberculosis are  
6  
7 typically higher than in the general community which exacerbates the risk of disease  
8  
9 transmission.<sup>6,8,9</sup> Additionally, it has been suggested that the close physical proximity in  
10  
11 prisons may induce psychological stress or intensify the existing stressful conditions in a  
12  
13 prison<sup>10,11</sup> leading to alterations in immune and cardiovascular functions.<sup>12</sup>  
14  
15  
16

17 The concept of crowding is understood in the academic literature and legislation as a  
18  
19 mechanism that impacts adversely on the health and well-being of prisoners. Reports on prison  
20  
21 conditions, prison standards and guidelines by international and regional agencies cite prison  
22  
23 crowding as major health and human rights concerns impacting on this population.<sup>13-17</sup> Left  
24  
25 untreated in prison, the risk of disease transmission to family, friends, intimate partners, and  
26  
27 other community members is likely upon leaving prison and returning to general society.<sup>18-22</sup>  
28  
29  
30

31 Despite decades of research dedicated to prison conditions and its impact on health,  
32  
33 there has been no systematic review to assess the quality of evidence of the association between  
34  
35 prison crowding and infectious and communicable disease transmission. A lack of consensus  
36  
37 exists on the best way to conceptualise and measure the essential element(s) of crowding with  
38  
39 the debate centring on the need for objective versus subjective measurements of crowding.<sup>23,24</sup>  
40  
41 The latter focuses on the individual experience or perception of crowding using subjective  
42  
43 ratings of conditions such as behavioural constraints, stimulus and cognitive overload, privacy,  
44  
45 desire to augment space, and loss of environmental control.<sup>12,25,26</sup> The former, objective  
46  
47 measures of prison crowding vary, but commonly revolve around metrics of prisoners per  
48  
49 allocation of space to derive a measure of density (Table 1).  
50  
51  
52

53  
54 (Insert Table 1 here)  
55

56 Some of these measures have been criticised as being amenable to manipulation by  
57  
58 prison authorities and thus regarded as invalid measures of prison crowding.<sup>27,24</sup> Measures iv.  
59  
60

1  
2  
3 to x. (Table 1) are regarded as objective measures of social and spatial density. *Social density*  
4 refers to the number of people in a defined area of the prison (e.g. the whole facility, wing,  
5 dormitory, or cell). *Spatial density* refers to the floor area of a defined area (e.g. entire prison  
6 or cell) divided by the number of people in that space<sup>11</sup>. Social and spatial densities are often  
7 dependent on one another, such as when the cell occupancy level increases, this causes a  
8 corresponding increase in both social density and spatial density. In this review, the area  
9 (measured in square feet or square metres) of the cell per person was selected as the cell  
10 crowding measure and is referred to as *cell spatial density*. This measure was adopted for two  
11 reasons. Firstly, the lack of consensus in the academic literature on the conceptualisation and  
12 measurement of crowding impressed the need to define cell crowding as an objectively defined  
13 environmental factor. Secondly, an examination of international guidelines on prison  
14 conditions and standards over the last half a century has seen a shift towards standards based  
15 on cell spatial density (see Simpson, Simpson and Butler, 2016). Cell spatial density as a metric  
16 has also entered the legislative domain such as in the Australian Capital Territory's *Human*  
17 *Rights Act 2004* which recommends 8.9m<sup>2</sup> for single cells and 10.7m<sup>2</sup> for double cells.<sup>16</sup>  
18  
19  
20  
21  
22  
23  
24  
25  
26  
27  
28  
29  
30  
31  
32  
33  
34  
35  
36

37 To determine the extent and quality of evidence on the association between prison cell  
38 crowding and health impacts, we were engaged by the New South Wales Department of Justice,  
39 Correctives Services to conduct a systematic review of studies that analysed the association  
40 between prison cell spatial density and prisoner infectious and communicable diseases and  
41 mental health and well-being outcomes. In this paper we present the results of our review of  
42 the association between cell spatial density and prisoner infectious and communicable disease  
43 effects, expressed in terms of the evidence of this association and the quality of the evidence.  
44  
45  
46  
47  
48  
49  
50  
51  
52

### 53 **Methods**

54 Under the direction of the NSW Ministry of Health and the NSW Department of Justice, an  
55 expert advisory panel was formed to guide the review comprising infectious diseases experts,  
56  
57  
58  
59  
60



1  
2  
3 public health professionals, academic staff and custodial administrators. A review protocol was  
4 developed following consultations with the advisory panel covering search strategy and  
5 selection criteria and study eligibility and appraisal. The Preferred Reporting Items for  
6 Systematic Reviews and Meta-Analyses Protocols (PRISMA-P) Guidelines was adopted for  
7 the review.<sup>28</sup>

### 14 ***Search strategy and selection criteria***

15  
16 A search string was agreed to identify articles on the association between cell spatial density  
17 and infectious and communicable diseases and mental health outcomes (Table 2). For the  
18 present paper, articles reporting on infectious and communicable disease outcomes were  
19 extracted from the final list of eligible studies. Review of the mental health outcome studies  
20 are reported elsewhere.<sup>29</sup> Infectious and communicable diseases are defined ‘as an illness due  
21 to a specific infectious agent or its toxic products that arises through transmission of such agent  
22 or products from an infected person, animal, or reservoir to a susceptible host, either directly  
23 or indirectly through an intermediate plant or animal host, vector or inanimate environment’.<sup>50</sup>

24  
25 The scope of the search was limited to the availability of an English abstract and to  
26 human subjects. Publication date was not restricted. Studies were excluded if they examined  
27 only temporary accommodation within custodial settings such as segregation cells, police cells,  
28 lockups, prison transport/transfer units, and prison clinic accommodation. Studies examining  
29 combined living and sleeping space preventing the differentiation of sleeping space were also  
30 excluded from the current review.

31  
32 Fourteen medical, social science and architectural databases were searched: EMBASE  
33 (1947-2015), PubMed (≈1800-2015), Medline (1946-2015), Scopus (1976-2015), PsycInfo  
34 (1806-2015), PsycExtra (1908-2015), Web of Science (1900-2015), Proquest Databases (1763-  
35 2015), Proquest Dissertations and Theses Global (1716-2015), Index to Legal Periodicals  
36 (1985-2015), Informit Online (1920-2015), Cochrane Library (≈1900-2015), Criminal Justice  
37  
38  
39  
40  
41  
42  
43  
44  
45  
46  
47  
48  
49  
50  
51  
52  
53  
54  
55  
56  
57  
58  
59  
60

1  
2  
3 Abstracts (1910-2015) and ICONDA (1976-2015). Grey literature was also identified from  
4 these database searches; and a further search for grey literature was conducted using Google  
5 and selected websites including those of the United Nations, International Committee of the  
6 Red Cross, Amnesty International, International Centre for Prison Studies, World Health  
7 Organization, Campbell Collaboration, the Criminal Justice Reference Service, the United  
8 States' (US) National Library of Medicine and websites of the Australian Inspector of  
9 Custodial Services. A number of international experts in the prisoner health area were  
10 contacted to inquire as to whether they were aware of additional material of potential interest  
11 to the review.  
12  
13  
14  
15  
16  
17  
18  
19  
20  
21  
22

23  
24 To manage records identified, articles were exported from databases into EndNote  
25 X7.1. Grey literature from non-database sources were entered into Endnote manually. PDF  
26 versions of articles were located and attached to Endnote items.  
27  
28  
29

30 (Insert Table 2 here)  
31  
32

### 33 ***Study eligibility***

34  
35 Articles were included if the study design featured in the Australian National Health and  
36 Medical Research Council's (NHMRC) Hierarchy of Evidence.<sup>30</sup> This includes systematic  
37 reviews of prospective cohort studies (level I evidence), prospective cohort study (level II  
38 evidence), 'all or none' study (i.e. either all or none of the people with the risk factor(s)  
39 experienced the outcome of interest) (level III-1 evidence) retrospective cohort study (level III-  
40 2 evidence), case-control study (level III-3 evidence), or cross-sectional study or case series  
41 (level IV evidence).<sup>30</sup>  
42  
43  
44  
45  
46  
47  
48  
49  
50

51 All publications identified by the search were screened by two independent teams of  
52 two reviewers (PS, AA, and MS, LY). To ensure consistency in the screening process and  
53 selection of eligible studies across the teams, the first 100 studies were independently reviewed  
54 by both teams using a data extraction template and the results of the review discussed as a  
55  
56  
57  
58  
59  
60

1  
2  
3 group to ensure consistency. After achieving a consensus on eligibility for inclusion across  
4 both teams, the remaining articles were divided between the two teams of reviewers. Each  
5 person within the team independently reviewed their assigned literature, and upon finishing,  
6 discussed the review outcome with the other team member. In those instances where there was  
7 disagreement within a team, both teams met to resolve the issues.  
8  
9

### 14 ***Critical appraisal of eligible studies***

15  
16  
17 Critical appraisal of eligible studies involved three stages: (i) data extraction,<sup>31</sup> (ii) assessment  
18 of bias, chance and confounding,<sup>32</sup> and (iii) an aggregated assessment of all studies using a  
19 modified NHMRC Evidence Scale and Statement Form to produce a final rating and evidence  
20 statement.<sup>30</sup>  
21  
22  
23  
24  
25

26 An adapted version of the NHMRC's standardised data summary table was used to  
27 extract data.<sup>31</sup> Data extraction tables were prepared and cross-checked by two independent  
28 reviewers (PS, MS). Extracted information included: general study details (citation, study  
29 design, length of follow-up, level of evidence, and location and setting); study exposure and  
30 control descriptions; population characteristics; internal and external validity considerations;  
31 and study outcomes and results.  
32  
33  
34  
35  
36  
37  
38  
39

40 Assessment of bias, chance and confounding was guided by the NHMRC's checklist to  
41 critically appraise aetiology or risk factor studies.<sup>32</sup> Checklist items used to guide the  
42 assessment of studies included: exposure misclassification; outcome misclassification;  
43 selection bias; confounding; and chance. Items were assessed on one of two 3-point scales: low  
44 (0), medium (1), high (2) risk; or poor (0), fair (1), good (2).  
45  
46  
47  
48  
49  
50

51 A systematic assessment of the overall body of the evidence was conducted using a  
52 modified (for study population relevance) NHMRC's Evidence Rating and Statement Form  
53 covering:<sup>30</sup> 1) evidence base; 2) consistency of results; 3) population health impact; and 4)  
54 generalisability. Each component was rated from Excellent to Poor (Appendix A) to allow a  
55  
56  
57  
58  
59  
60

1  
2  
3 final overall rating and evidence statement to be derived ranging from 'A' to 'D': 'A' indicating  
4 that the body of evidence can be trusted to 'D' indicating that the body of evidence is weak,  
5 and findings cannot be trusted. (Appendix B).<sup>30</sup> The final overall rating and evidence statement  
6  
7  
8  
9  
10 were undertaken by one reviewer (PS) and cross-checked by another (MS).

11  
12 Following the completion of the review by the team, an expert, independent of the  
13 reviewers and advisory panel, peer reviewed the methodology and findings.

### 14 15 16 17 ***Patient and public involvement***

18 Patients and the public were not involved in the review.

### 19 20 21 22 **Findings**

23  
24  
25 After removing duplicate records and newspaper and magazine articles, a total of 3,532 records  
26 were assessed for eligibility based on publication title and abstract content (Figure 1). As a  
27 result of this screening, 26 peer-reviewed and 10 items of grey literature that reported on  
28 infectious and communicable diseases and/or mental health outcomes were identified for final  
29 assessment for eligibility. For the present review, six publications met the inclusion criteria for  
30 infectious and communicable disease outcomes; four articles were published in peer-reviewed  
31 journals<sup>33-36</sup> and two were reports.<sup>27,37</sup> Two articles related to the same research program on  
32 prison crowding;<sup>27,37</sup> two articles derived from the same study on infectious skin conditions.<sup>35,36</sup>  
33  
34 Four articles examined the association between cell spatial density and pneumococcal disease  
35 or acute pneumonia,<sup>33</sup> mycobacterium tuberculosis (MTB),<sup>34</sup> and infectious skin  
36 conditions,<sup>35,36</sup> respectively, while two articles reported on communicable illness presentation  
37 to the prison clinic.<sup>27,37</sup> Three studies were conducted in the United States of America  
38 (US),<sup>27,33,37</sup> two in Nigeria<sup>35,36</sup> and one in Pakistan (Table 3).<sup>34</sup> Meta-analysis was not possible  
39 due to heterogeneity and incomplete reporting of findings.

40  
41  
42  
43  
44  
45  
46  
47  
48  
49  
50  
51  
52  
53  
54  
55  
56  
57  
58 Five studies were cross-sectional in design (level IV aetiology evidence) and one  
59 included both a case-control and cohort study design reported in the same article (level III-

1  
2  
3 3/III-2 aetiology evidence). Outcome measures for the pneumococcal disease<sup>33</sup> and MTB<sup>34</sup>  
4 studies were measured using a standardised and reliable approach [tuberculin sensitivity test  
5 (TST) using the Mantoux method, culture from blood, pleural or spinal fluid specimen, and  
6 radiograph]. Two articles measured infectious skin conditions<sup>35,36</sup> ‘in part’ in a standardised  
7 and reliable way (clinical examination of the body by a consultant dermatologist and  
8 venereologist). The validity and reliability of the outcome measure for the two studies  
9 examining communicable illness presentations to a prison clinic,<sup>27,37</sup> was deemed poor. This is  
10 because presentations to a prison clinic may additionally capture other parameters of health  
11 service use besides and beyond health effects such as, dispositional characteristics of prisoners  
12 and the administration of medical care in the prison.<sup>37</sup>

13  
14  
15  
16  
17  
18  
19  
20  
21  
22  
23  
24  
25  
26  
27  
28  
29  
30  
31  
32  
33  
34  
35  
36  
37  
38  
39  
40  
41  
42  
43  
44  
45  
46  
47  
48  
49  
50  
51  
52  
53  
54  
55  
56  
57  
58  
59  
60  
Although the sampling framework was described well in most studies, the sampling  
method was absent in two articles<sup>35,36</sup> and response rates were not reported in four articles.<sup>27,35-</sup>  
<sup>37</sup> Self-report measures were used in all studies to determine potential confounders such as  
underlying medical conditions and demographic information, therefore recall bias is a  
possibility. With the exception of the case-control and cohort studies (case-control: N=25  
cases/75 controls; cohort: N=46),<sup>33</sup> sample sizes were relatively similar across the five cross-  
sectional studies (N=289-425). Three studies considered or adjusted for confounding factors  
or effect modifiers in the analyses;<sup>27,34,37</sup> two studies did not,<sup>35,36</sup> and it is unclear whether  
multivariate analysis was conducted in one study.<sup>33</sup>

### ***Evidence of an association between cell spatial density and infectious and communicable diseases***

While the review found mostly consistent evidence that cell spatial density is associated  
with clinically verifiable infectious and communicable diseases, with five articles reporting a  
statistically significant association between cell spatial density and infectious and

1  
2  
3 communicable diseases (Table 3), all but one of these associations could possibly being  
4 explained by chance, study bias or confounding.  
5  
6

7  
8 In the study which investigated MTB infection in a random sample of 425 male  
9 prisoners in five Pakistan prisons, the association between cell spatial density and MTB was  
10 reported to be statistically significant (aOR 2.6; 95%CI: 1.6, 4.3) after adjusting for age,  
11 education, length of incarceration, tobacco use and other variables.<sup>34</sup> However, caution is  
12 warranted when interpreting this result due to the possible exposure and outcome  
13 misclassification. That is, the cell spatial density measure was a dichotomised average floor  
14 area per person (i.e.  $>5.6\text{m}^2$  per person and  $\leq 5.6\text{m}^2$  per person) and thus may be a crude  
15 measure. The study does not report on how this measure was determined. Additionally, the  
16 100% response rate to the screening suggests possible coercion to participate in the study that  
17 may have affected the reliability of self-report data ta (e.g. household income, occupation).  
18  
19  
20  
21  
22  
23  
24  
25  
26  
27  
28  
29

30 One US' study investigating a pneumococcal disease outbreak<sup>33</sup> examined the disease  
31 attack rate and its association with cell spatial density. Although more clarity and consistency  
32 in reporting of the analysis is needed to properly assess the findings, the results indicate that  
33 the attack rate was highest in 4-person cells ( $2.9\text{m}^2$  per person) compared with the two other  
34 cell types described (single cells at  $4.2\text{m}^2$  per person and open dormitories at  $2.6\text{m}^2$  per person).  
35 The study also reports that detainees housed in shared and single areas  $\geq 7.4\text{m}^2$  per person (8%  
36 of the inmate population) had significantly fewer cases of pneumococcal disease than all other  
37 detainees (attack rate: 0 vs. 4.7 per 1000 persons;  $p=0.03$ ). This lower attack rate for detainees  
38 housed in shared areas  $\geq 7.4\text{m}^2$  per person may in part be explained by time spent outside cells  
39 as those housed in this area were engaged in work programs and left their cells to undertake  
40 such work. Results were inconsistently reported across cell types with both univariate and  
41 adjusted odds ratios reported for the different cell types suggesting that some results were  
42 adjusted for and some not.  
43  
44  
45  
46  
47  
48  
49  
50  
51  
52  
53  
54  
55  
56  
57  
58  
59  
60

1  
2  
3 In the two studies conducted with mostly male (97%) prisoners in Nigeria, the  
4 prevalence of infectious and non-infectious skin conditions among prisoners living in single  
5 cells (0.9m<sup>2</sup> per person) and dormitories (2.4m<sup>2</sup> per person) was significantly different at 61.7%  
6 vs. 43.2%<sup>35</sup> and 82.9% vs. 69.7%.<sup>35,36</sup> However, the quality for these studies was assessed as  
7 'poor' due to the absence of any multivariate analysis, no details of whether those conducting  
8 the physical examinations were blinded to the cell assignments of the prisoners, no response  
9 rates or sampling method described, and cell type details derived from self-report  
10 questionnaires.  
11  
12  
13  
14  
15  
16  
17  
18  
19  
20

21 Two other US' articles reporting on the association between cell spatial density and  
22 illness reporting at the prison clinic were from a research program spanning approximately ten  
23 years reporting on data collected from 1,400 prisoners from six federal prisons.<sup>37,38</sup> Illness  
24 reporting rates were determined by dividing the number of days a participant was in a cell type  
25 (with a specific cell social or spatial density) by the number of visits to a clinic. Not all  
26 outcomes were measured at and/or reported for all prison sites, and prisoner population  
27 characteristics, sampling methods, response rates and analytical procedures are not consistently  
28 reported across and within publications. One article, the Danbury prison study, reported results  
29 on illness reporting by contagious status,<sup>27</sup> covering: venereal disease; eye, ear, nose, throat  
30 infections; cough, cold, flu; gastrointestinal, stomach problems; skin conditions; virus; chills  
31 and fever. However, the lack of detail on the statistical analysis means it is unclear if potential  
32 confounders and effect modifiers were adjusted for. Nonetheless, the findings reported a  
33 significant difference (although *p* values were not reported) in contagious illness reporting  
34 between those in single occupant cells of 4.5 and/or 5.6m<sup>2</sup> per person (0.03 reports per week)  
35 and those in dormitories with a spatial density of 4.6 and/or 5.5m<sup>2</sup> (0.06 reports per week) per  
36 person. As the reported cell spatial area range of these two cell types are nearly identical, this  
37  
38  
39  
40  
41  
42  
43  
44  
45  
46  
47  
48  
49  
50  
51  
52  
53  
54  
55  
56  
57  
58  
59  
60

1  
2  
3 is likely to say more about the effect of social density (the number of individuals per cell) or  
4 cell type (dormitories versus singles) than it does on cell spatial density.  
5  
6

7  
8 The second US' study from this research, examined cell spatial density in single  
9 occupancy cells alone in two federal prisons.<sup>37</sup> Using multiple linear regression analysis  
10 statistically significant effects were reported in only one of the prisons. For contagious illness,  
11 the cell spatial density variable was reported as not significant ( $p=0.88$ ). However, the validity  
12 and reliability of the outcome measure used is questionable as the measure may capture other  
13 parameters of health service use besides health effects.  
14  
15  
16  
17  
18  
19  
20  
21  
22  
23

24 (Insert Table 3 here)  
25

## 26 **Discussion**

27  
28 Despite the attention that prison crowding receives, this review identified only six articles  
29 examining cell spatial density and infectious diseases. While the methodological approach  
30 adopted in this review ensured that that the largest number of peer-reviewed and grey literature  
31 publications were identified, some studies and outcomes may have been missed due to  
32 publication and outcome reporting bias. Some journals may be more likely to publish studies  
33 that report statistically significant results and overlook studies that are not consistent with  
34 previously published studies, present 'negative data' that disproves the investigators'  
35 hypothesis, as well results that could be interpreted to be of little interest or relevance to their  
36 readership.<sup>38</sup> Due to the difficulty in located study protocols, assessment of selective reporting  
37 of outcomes was not conducted. Thus, outcome reporting bias may also be present.  
38  
39  
40  
41  
42  
43  
44  
45  
46  
47  
48  
49

50  
51 The identified six studies were conducted with mostly male prisoner populations in the  
52 US, Pakistan and Nigeria. Infectious and communicable disease outcomes reported included  
53 pneumococcal disease, MTB, skin conditions, and prisoner reporting of communicable illness  
54  
55  
56  
57  
58  
59  
60



1  
2  
3 to the prison clinic. Five were cross-sectional studies and one was a combined case-control and  
4  
5 cohort study.  
6

7  
8 Overall, the evidence concerning the association between prison cell spatial density and  
9  
10 infectious and communicable disease effects was given a rating of ‘C’ on the NHMRC  
11  
12 Evidence Rating Scale (ranging from ‘A’ to ‘D’) indicating that “*the body of evidence provides*  
13  
14 *some support for an association between cell spatial density and infectious and communicable*  
15  
16 *diseases but care should be taken in the interpretation of the findings*”.<sup>30</sup> The review found  
17  
18 that there was mostly consistent evidence that cell spatial density is associated with clinically  
19  
20 verifiable infectious and communicable diseases. Although all six studies reported a  
21  
22 statistically significant association between cell spatial density and infectious and  
23  
24 communicable disease effects (one study reporting a negative association), the quality of the  
25  
26 studies was assessed as poor due to risk of exposure/outcome misclassification, bias, chance  
27  
28 and/or confounding. However, the Pakistan study on MTB<sup>35</sup> adjusted for potential confounders  
29  
30 and chance.  
31  
32  
33  
34

35  
36 The cross-sectional design of five of these studies means the ability to assess causality  
37  
38 is limited in that they were carried out at one given point in time and provide no indication of  
39  
40 the sequence of events. As such, it remains unclear whether cell spatial density exposure  
41  
42 preceded or followed the onset of infectious or communicable diseases reported in these  
43  
44 studies. The associations and statistical precision observed in the articles suggest the possibility  
45  
46 of a ‘slight’ health impact of cell spatial density on prisoners in regard to infectious diseases.  
47  
48 However, it is possible that these associations are due to confounding, bias and/or chance. In  
49  
50 addition, differences between the populations examined in these studies were apparent in terms  
51  
52 of socio-cultural demographics, institutional settings and practices, and the background  
53  
54 prevalence of infectious and communicable diseases outcomes in the respective countries (US,  
55  
56 Nigeria, Pakistan, Australia). Studies were also conducted in different decades. These apparent  
57  
58  
59  
60

1  
2  
3 differences restrict the generalisability and transferability of the observed effects to correctional  
4 contexts outside the countries where the reviewed studies were conducted.  
5  
6

### 7 ***Implications for researchers and policy makers***

8  
9  
10 Further research is needed that addresses the confounding, bias and chance elements in studies  
11 examined by this review. In most studies, inadequate attempts were made to adjust for personal  
12 characteristics and/or prison-related factors as potential confounders. This acknowledges that  
13 cell spatial density, as an objective condition of crowding, is likely to be embedded in a  
14 complex interplay of psychological, social, cultural and institutional factors, and that variations  
15 of any health effects cannot be fully understood without their consideration. Future research  
16 should incorporate more extensive data and analyses on prospective mediating factors and how  
17 they interact with cell spatial density and health effects.  
18  
19  
20  
21  
22  
23  
24  
25  
26  
27

28 Although the body of evidence assessed indicated cautious support for the association  
29 between prison cell spatial density and infectious and communicable diseases, we do not  
30 advocate increasing social and spatial density and there is likely to be reasonable grounds for  
31 policy responses to address prison crowding in the absence of scientific certainty. As one US'  
32 Court of Appeals<sup>40</sup> ruling stated:  
33  
34  
35  
36  
37  
38  
39

40 *Undoubtedly, certainty is the scientific ideal - to the extent that even science*  
41 *can be certain of its truth. But certainty in the complexities of environmental*  
42 *medicine may be achievable only after the fact, when scientists have the*  
43 *opportunity for leisurely and isolated scrutiny of an entire mechanism.*  
44  
45  
46  
47  
48  
49 *Awaiting certainty will often allow for only reactive, not preventive regulation.*  
50

51 In the absence of scientific certainty, international standards and recommendations provide  
52 guidance by way of mitigating prison and prison cell crowding and any potential infectious and  
53 communicable disease effects this may bring. The International Red Cross Association (ICPA)  
54 handbook on *Water, Sanitation, Hygiene and Habitat in Prisons* recognises that any technical  
55  
56  
57  
58  
59  
60

1  
2  
3 focus on prisons to address potential adverse health effects, such as cell spatial density, cannot  
4 be separated from addressing other factors that mediate prisoner health and wellbeing.<sup>17</sup> Some  
5  
6 ICPA guidelines and recommendations are feasible in terms of implementation in the short  
7  
8 term to address immediate need (e.g. access to health care and sanitary facilities and extending  
9  
10 time ‘out-of-cell’ to participate in meaningful activities). A public health approach to  
11  
12 addressing any adverse health effects associated with prison cell crowding should include  
13  
14 prevention strategies ranging from the micro- to the macro-level. The United Nations’ Office  
15  
16 of Drugs and Crime *Handbook on Strategies to Reduce Overcrowding in Prisons*<sup>13</sup>  
17  
18 acknowledges that to address the health effects associated with crowding, ‘decarceration’  
19  
20 strategies to prevent prison crowding occurring in the first instance is required. Decarceration  
21  
22 strategies involve processes that remove people from prisons and prevent them from  
23  
24 (re)entering prison. This is likely to be a longer-term strategy that will require extensive work  
25  
26 involving multiple agencies from different sectors, and changes in political and societal  
27  
28 attitudes to incarceration.  
29  
30  
31  
32  
33  
34  
35  
36  
37  
38  
39  
40  
41  
42  
43  
44  
45  
46  
47  
48  
49  
50  
51  
52  
53  
54  
55  
56  
57  
58  
59  
60

## Contributions

PLS is the guarantor. PLS, MS, AA and TGB drafted the manuscript. All authors contributed to the development of the selection criteria. PLS, MS and TGB contributed to the risk of bias assessment strategy, data extraction templates and developed the search strategies. All authors read, provided feedback and approved the final manuscript.

## Acknowledgements

We would like to acknowledge Advisory Panel members Professor Wayne Smith and Dr Benjamin Scalley of the New South Wales Ministry of Health; Garry Forrest and Denise Monkley of the Justice Health and Forensic Mental Health Network; and Janaya Ho of Corrective Services New South Wales. We would also like to acknowledge the independent peer-review undertaken by Associate Professor Jeffrey Post, and Dr Lorraine Yap and Marina Talevski with respect to their contributions to this review.

## Ethics

Ethics approval was not required. Please see 'Ethical approval for literature reviews and meta-analyses' on the UNSW Sydney Research Ethics & Compliance Support Frequently Asked Questions (FAQs) page (<https://research.unsw.edu.au/frequently-asked-questions-faqs>).

## Transparency declaration

The lead author affirms that this manuscript is an honest, accurate, and transparent account of the study/review being reported; that no important aspects of the study/review have been omitted; and that any discrepancies from the study/review as planned have been explained.

## Funding

Under the direction of the New South Wales Ministry of Health, the New South Wales Department of Justice funded this review. To ensure appropriate management of perceived or potential conflicts of interest, the expert advisory panel that was formed to guide the review

1  
2  
3 comprised of diverse stakeholders, including medical practitioners, infectious diseases  
4  
5 experts, public health professionals, a custodial administrator and academic staff. Author and  
6  
7 custodial administrator LG, who although contributed to the scope of the search criteria and  
8  
9 provided feedback and approval of the final manuscript, did not contribute to data extraction,  
10  
11 confounder, bias and chance assessment, aggregated evidence appraisal and ratings and the  
12  
13 interpretation of findings.  
14  
15

### 16 17 **Competing interest statement**

18  
19 There was grant support from the New South Wales Department of Justice during the conduct  
20  
21 of the study. There are no financial relationships with any other organisations that might have  
22  
23 an interest in the submitted work in the previous three years. Author LG is a custodial  
24  
25 administrator LG and could give the appearance of potentially influencing findings. Although  
26  
27 LG contributed to the scope of the search criteria and provided feedback and approval of the  
28  
29 final manuscript, he did not contribute to data extraction, confounder, bias and chance  
30  
31 assessment, aggregated evidence appraisal and ratings and the interpretation of findings.  
32  
33  
34  
35  
36  
37  
38  
39  
40  
41  
42  
43  
44  
45  
46  
47  
48  
49  
50  
51  
52  
53  
54  
55  
56  
57  
58  
59  
60

## References

1. United Nations. World Population Prospects: The 2018 Revision. In: United Nations, Department of Economic and Social Affairs, Population Division, editor. New York; 2018. <https://esa.un.org/unpd/wup/Download/>
2. Huber A, Rope O, Sheahan S. *Global Prison Trends 2017*. London: Penal Reform International, 2017.
3. Walmsley R. *World Prison Population List, 11th Edition*: Institute for Criminal Policy Research, 2016.
4. Fazel S, Baillargeon J. The health of prisoners. *Lancet* 2011; 377(956-965).
5. Walker B, Gordon T. Health and high-density confinement in jails and prisons. *Federal Probation* 1980; 44: 53-7.
6. Walker B. Prison population pressures: The epidemiological basis for present density standards. *Journal of Environmental Health* 1991; 54(2): 18-20.
7. European Centre for Disease Prevention and Control. *Systematic Review on Active Case Finding of Communicable Diseases in Prison Settings*. Stockholm: European Centre for Disease Prevention and Control and the European Monitoring Centre for Drugs and Drug Addiction, 2017.
8. New York State Commission of Correction. *Examination of Density and Crowding in Correctional Facilities and their Applicability to the Question of Double-Celling*. New York, USA: New York State Commission of Correction, 1981.
9. UNAIDS. UNAIDS Technical Update Prisons and AIDS Geneva: Joint United Nations Programme on HIV/AIDS, 1997.
10. Gaes GG. Effects of Overcrowding in Prison In: Tonry M, Morris N, eds. *Crime and Justice Volume 6: An Annual Review of Research*. Chicago, USA: The University of Chicago Press; 1985.

- 1  
2  
3 11. Paulus PB. *Prison Crowding: A Psychological Perspective*. New York: Springer-  
4  
5 Verlag 1988.  
6
- 7  
8 12. Cox VC, Paulus PB, McCain G. Prison Crowding Research: The relevance for prison  
9  
10 housing standards and a general approach regarding crowding phenomena. *American*  
11  
12 *Psychologist* 1984; 39(10): 1148-60.  
13
- 14  
15 13. United Nations Office on Drugs and Crime. *Handbook on Strategies to Reduce*  
16  
17 *overcrowding in Prisons*. Vienna: United Nations Office on Drugs and Crime, 2010.  
18
- 19  
20 14. United Nations Office on Drugs and Crime. *The United Nations Standard Minimum*  
21  
22 *Rules for the Treatment of Prisoners ('the Mandela Rules')*. Geneva: United Nations,  
23  
24 2015.  
25
- 26  
27 15. European Committee for the Prevention of Torture and Inhuman or Degrading  
28  
29 Treatment or Punishment. *European Committee for the Prevention of Torture and*  
30  
31 *Inhuman or Degrading Treatment or Punishment (CPT): CPT Standards*. Strasbourg  
32  
33 Cedex, France: Council of Europe, 2015.  
34
- 35  
36 16. International Committee of the Red Cross. *Review of Space Accommodation Standards*  
37  
38 *in Prison Cells*. Geneva: International Committee of the Red Cross, 2014.  
39
- 40  
41 17. International Committee of the Red Cross. *Water, Sanitation, Hygiene and Habitat in*  
42  
43 *Prisons: Supplementary Guidance*. Geneva, Switzerland: International Committee of  
44  
45 the Red Cross, 2012.  
46
- 47  
48 18. Farmer PE, Kononets AS, Borisov SE, Goldfarb A, Healing T, McKee M. Recrudescence  
49  
50 tuberculosis in the Russian Federation. In: Farmer PE, Reichman LB, Iseman MD, eds.  
51  
52 *The Global Impact of Drug Resistant Tuberculosis*. Boston, MA: Harvard Medical  
53  
54 School/Open Society Institute; 1999.  
55
- 56  
57 19. Greifinger RB. Inmates as public health sentinels prison reform: Commission on Safety  
58  
59 and Abuse in America's Prisons. *Journal of Law and Policy* 2006; 22: 253-64.  
60

- 1
  - 2
  - 3
  - 4
  - 5
  - 6
  - 7
  - 8
  - 9
  - 10
  - 11
  - 12
  - 13
  - 14
  - 15
  - 16
  - 17
  - 18
  - 19
  - 20
  - 21
  - 22
  - 23
  - 24
  - 25
  - 26
  - 27
  - 28
  - 29
  - 30
  - 31
  - 32
  - 33
  - 34
  - 35
  - 36
  - 37
  - 38
  - 39
  - 40
  - 41
  - 42
  - 43
  - 44
  - 45
  - 46
  - 47
  - 48
  - 49
  - 50
  - 51
  - 52
  - 53
  - 54
  - 55
  - 56
  - 57
  - 58
  - 59
  - 60
20. Shilova MV, Dye C. The resurgence of tuberculosis in Russia. *Philosophical Transactions of the Royal Society of London Biological Sciences* 2001; 29: 1069-75.
21. Stern V. *The Problems of TB in Prisons in Eastern Europe and Central Asia*. London: International Centre for Prison Studies, 1999.
22. Zulficar GR. Public Health Implications of Substandard Correctional Health Care. *American Journal of Public Health* 2005; 95(10): 1689-91.
23. Gaes GG. Prison crowding research re-examined. *Prison Journal* 1994; 74(3): 329-63.
24. Ostfeld AM, Kasl SV, D'Atri DA, Fitzgerald EF. *Stress, Crowding, and Blood Pressure in Prison*. New Jersey: Lawrence Erlbaum Associates; 1987.
25. Schmidt DE, Keating JP. Human crowding and personal control: An integration of the research. *Psychological Bulletin* 1979; 86(4): 680-700.
26. Stokols D. Environmental Psychology. *Annual Review of Psychology* 1978; 29(1): 253-95.
27. McCain G, Cox VC, Paulus PB. *The Effect of Prison Crowding on Inmate Behavior*. Washington DC: National Institute of Justice; 1980.
28. Shamseer L, Moher D, Clarke M, Ghersi D, Liberati A, Petticrew M, Shekelle P, Stewart L, PRISMA-P Group. Preferred reporting items for systematic review and meta-analysis protocols (PRISMA-P) 2015: elaboration and explanation. *BMJ* 2015; 349(jan02 1): g7647.
29. Simpson PL, Simpson M, Butler T. *Prison Cell Size and Adverse Health Effects: A Systematic Review*. Sydney: The Kirby Institute, UNSW Australia and Corrective Services NSW. (ISBN-10: 0-7334-3615-3; ISBN-13: 978-0-7334-3615-4). 2016.
30. National Health and Medical Research Council. *NHMRC Additional Levels of Evidence and Grades for Recommendations for Developers of Guidelines*. Canberra, ACT, Australia: National Health and Medical Research Council, 2009.



- 1  
2  
3 31. National Health and Medical Research Council. *NHMRC Standards and Procedures*  
4 *for Externally Developed Guidelines*. Canberra, ACT, Australia.: National Health and  
5  
6  
7  
8  
9  
10  
11  
12  
13  
14  
15  
16  
17  
18  
19  
20  
21  
22  
23  
24  
25  
26  
27  
28  
29  
30  
31  
32  
33  
34  
35  
36  
37  
38  
39  
40  
41  
42  
43  
44  
45  
46  
47  
48  
49  
50  
51  
52  
53  
54  
55  
56  
57  
58  
59  
60
32. National Health and Medical Research Council. *How to Review the Evidence: Systematic Identification and Review of the Scientific Literature*. Canberra: National Health and Medical Research Council, 2000.
33. Hoge CW, Reichler MR, Dominguez EA, et al. An epidemic of pneumococcal disease in an overcrowded, inadequately ventilated jail. *The New England Journal of Medicine* 1994; 331(10): 643-8.
34. Hussain H, Akhtar S, Nanan D. Prevalence of and risk factors associated with Mycobacterium tuberculosis infection in prisoners, North West Frontier Province, Pakistan. *International Journal Epidemiology* 2003; 32(5): 794-9.
35. Oninla OA, Onayemi O. Skin infections and infestations in prison inmates. *International Journal Dermatology* 2012; 51(2): 178-81.
36. Oninla OA, Onayemi O, Olasode OA, Oninla SO. Pattern of dermatoses among inmates of Ilesha Prison, Nigeria. *The Nigerian Postgraduate Medical Journal* 2013; 20(3): 174-80.
37. Gaes GG. *The effect of Spatial and Architectural Housing Variations on Acute Inmate Morbidity Indicators*. Unpublished manuscript. Washington DC: Office of Research, Federal Prison System, 1982.
38. Gopalakrishnan S, Ganeshkumar P. Systematic Reviews and Meta-analysis: Understanding the Best Evidence in Primary Healthcare. *Journal of Family Medicine and Primary Care* 2013; 2(1): 9-14.
39. United States Court of Appeals. *Eighth Annual Report on the Council of Environmental Quality*. Washington D.C., 1977.

- 1  
2  
3  
4  
5  
6  
7  
8  
9  
10  
11  
12  
13  
14  
15  
16  
17  
18  
19  
20  
21  
22  
23  
24  
25  
26  
27  
28  
29  
30  
31  
32  
33  
34  
35  
36  
37  
38  
39  
40  
41  
42  
43  
44  
45  
46  
47  
48  
49  
50  
51  
52  
53  
54  
55  
56  
57  
58  
59  
60
40. McCorkle RC, Miethe TD, Drass KA. The roots of prison violence: a test of the deprivation, management, and "not-so-total" institution models. *Crime and Delinquency* 1995; 41(3): 317-31.
  41. Tartaro C. The impact of density on jail violence. *Journal of Criminal Justice* 2002; 30(6): 499-510.
  42. Anson RH. Overcrowding and Inmate Fatalities. *International Journal of Comparative and Applied Criminal Justice* 1984; 8(1-2): 93-100.
  43. Bonta J, Kiem T. Institutional misconducts in a jail setting: Preliminary findings and a note of caution. *Crime and Justice* 1978; 6: 175-8.
  44. Ruback RB. Crowding in a Woman's Prison - Attitudinal and Behavioral Effects. *Journal of Applied Social Psychology* 1984; 14(1): 57-68.
  45. Atlas R. *Violence in Prison - Architectural Determinism*. Florida State University, 1982.
  46. Urrego J, Ko AI, da Silva Santos Carbone A, et al. The impact of ventilation and early diagnosis on tuberculosis transmission in Brazilian prisons. *The American Journal of Tropical Medicine and Hygiene* 2015; 93(4): 739-46.
  47. Ekland-Olson S, Barrick DM, Cohen LE. Prison overcrowding and disciplinary problems: An analysis of the Texas prison system. *The Journal of Applied Behavioral Science* 1983; 19: 163-76.
  48. Megargee EI. The association of population density, reduced space, and uncomfortable temperatures with misconduct in a prison community. *American Journal of Community Psychology* 1977; 5(3): 289-98.
  49. McCain G, Cox V, Paulus P. Relationship between illness complaints and degree of crowding in a prison environment. *Environment and Behavior* 1976; 8(1): 283-90.

- 1  
2  
3 50. Porta M, ed. A dictionary of epidemiology. 6th ed. New York: Oxford University Press,  
4  
5 2014.  
6  
7  
8  
9  
10  
11  
12  
13  
14  
15  
16  
17  
18  
19  
20  
21  
22  
23  
24  
25  
26  
27  
28  
29  
30  
31  
32  
33  
34  
35  
36  
37  
38  
39  
40  
41  
42  
43  
44  
45  
46  
47  
48  
49  
50  
51  
52  
53  
54  
55  
56  
57  
58  
59  
60

For peer review only

## Tables and Figures

Table 1. Objective prison crowding measures identified in the literature

| Measure                                                                                                               | Example of study utilising measure       |
|-----------------------------------------------------------------------------------------------------------------------|------------------------------------------|
| i. Prisoner population divided by the design capacity of the prison                                                   | McCorkle et al, 1995 <sup>40</sup>       |
| ii. Prisoner population divided by the rated capacity of the prison                                                   | Tartaro, 2002 <sup>41</sup>              |
| iii. Percentage of prison cells or dormitories reported as overcrowded by the institution                             | Anson, 1984 <sup>42</sup>                |
| iv. Prisoner population divided by the total number of available beds                                                 | Bonta & Kiem, 1978 <sup>43</sup>         |
| v. Number of prisoners per prison                                                                                     | Ruback & Carr, 1984 <sup>44</sup>        |
| vi. Number of prisoners per living space/cell unit (including communal areas)                                         | Atlas, 1982 <sup>45</sup>                |
| vii. Number of prisoners per cell                                                                                     | Urrego et al, 2015 <sup>46</sup>         |
| viii. Number of square metres of the total prison floor area per person                                               | Ekland-Olsen et al, 1983 <sup>47</sup>   |
| ix. Number of square metres of the total living space/cell unit of the prisoner (including communal areas) per person | Megargee, 1977 <sup>48</sup>             |
| x. Number of square metres of the cell per person                                                                     | McCain, Cox & Paulus, 1976 <sup>49</sup> |

Table 2. Search terms used to identify evidence to inform the systematic review (example for PubMed database)

| Academic databases                                                                     |                                                                                                                                                                                                                                                                                                                                                                                                                                                                                                                                                                                                                                                                                                                                                                                                                                         |
|----------------------------------------------------------------------------------------|-----------------------------------------------------------------------------------------------------------------------------------------------------------------------------------------------------------------------------------------------------------------------------------------------------------------------------------------------------------------------------------------------------------------------------------------------------------------------------------------------------------------------------------------------------------------------------------------------------------------------------------------------------------------------------------------------------------------------------------------------------------------------------------------------------------------------------------------|
| Search terms                                                                           | <p>prison OR “corrective service*” OR “correctional cent*” OR “correctional complex” OR “correctional facilit*” OR borstal OR jail* OR gaol* OR penitentiary OR “detention cent*” OR custody OR custodial OR “closed setting*” AND</p> <p>accommodation OR cell OR room OR cubicle OR dormitory OR *crowding OR “social density” OR “spatial density” AND</p> <p>health OR illness OR sickn* OR infectio* OR transmissi* OR disease* OR hepatitis OR HIV OR tuberculosis OR parasite* OR bacteria* OR virus OR viral OR influenz* OR gastroent* OR disorder OR depressi* OR stress OR anxiety OR aggression OR irritability OR violence OR self-harm OR suicide OR well-being OR wellbeing AND</p> <p>prisoner* OR inmate* OR incarcerated OR criminal* OR felon* OR remandee* OR delinquent* OR detainee* OR convict* OR cellmate*</p> |
| Targeted grey literature                                                               |                                                                                                                                                                                                                                                                                                                                                                                                                                                                                                                                                                                                                                                                                                                                                                                                                                         |
| Search terms <sup>#</sup>                                                              | Prison cell and health effects, prison cell and health, jail cell and health, jail cell and health effects, prison cell and health and size, jail cell and health and size                                                                                                                                                                                                                                                                                                                                                                                                                                                                                                                                                                                                                                                              |
| <sup>#</sup> Search terms varied according to website, only some examples are provided |                                                                                                                                                                                                                                                                                                                                                                                                                                                                                                                                                                                                                                                                                                                                                                                                                                         |

Table 3. Effect size or p value (test of difference) of outcomes for cell spatial density exposure values in eligible studies

| Study                                                                        | Sample (N, country) | Cell spatial density values (m <sup>2</sup> per person)                  | Health outcome                           | Effect size or p value                                                   |
|------------------------------------------------------------------------------|---------------------|--------------------------------------------------------------------------|------------------------------------------|--------------------------------------------------------------------------|
| Hussain et al. (2003) <sup>34</sup>                                          | 425, Pakistan       | >5.6 vs ≤5.6                                                             | Mycobacterium tuberculosis               | <b>aOR 2.6; 95%CI 1.6, 4.3</b>                                           |
| Hoge et al. (1989) <sup>33</sup>                                             | 46 (cohort), US     | 2.9 vs 4.2 & 2.6<br>13.0 vs (2.9, 4.2 & 2.6);<br>6.8 vs (2.9, 4.2 & 2.6) | Pneumococcal disease                     | <b>aOR 2.0; 95%CI 1.1, 3.8</b><br><b>p&lt;0.001</b><br><b>p&lt;0.001</b> |
| Oninla & Onayemi (2012) <sup>35</sup>                                        | 305, Nigeria        | 0.9 vs 2.4                                                               | Infectious dermatoses                    | <b>p=0.03</b>                                                            |
| Oninla et al. (2013) <sup>36</sup>                                           | 305, Nigeria        | 0.9 vs 2.4                                                               | Infectious and non-infectious dermatoses | <b>p&lt;0.001</b>                                                        |
| McCain et al. (1980) <sup>49</sup>                                           | 289, US             | 4.5/5.6 vs 4.6/5.5                                                       | Contagious illness reporting at clinic   | <b>p&lt;0.05</b>                                                         |
| Gaes (1982) <sup>37</sup>                                                    | 352, US             | 4.0 to 8.2                                                               | Contagious illness reporting at clinic   | ns                                                                       |
| <b>Bold</b> = statistical significance<br>ns = not statistically significant |                     |                                                                          |                                          |                                                                          |

Figure 1. Study selection process

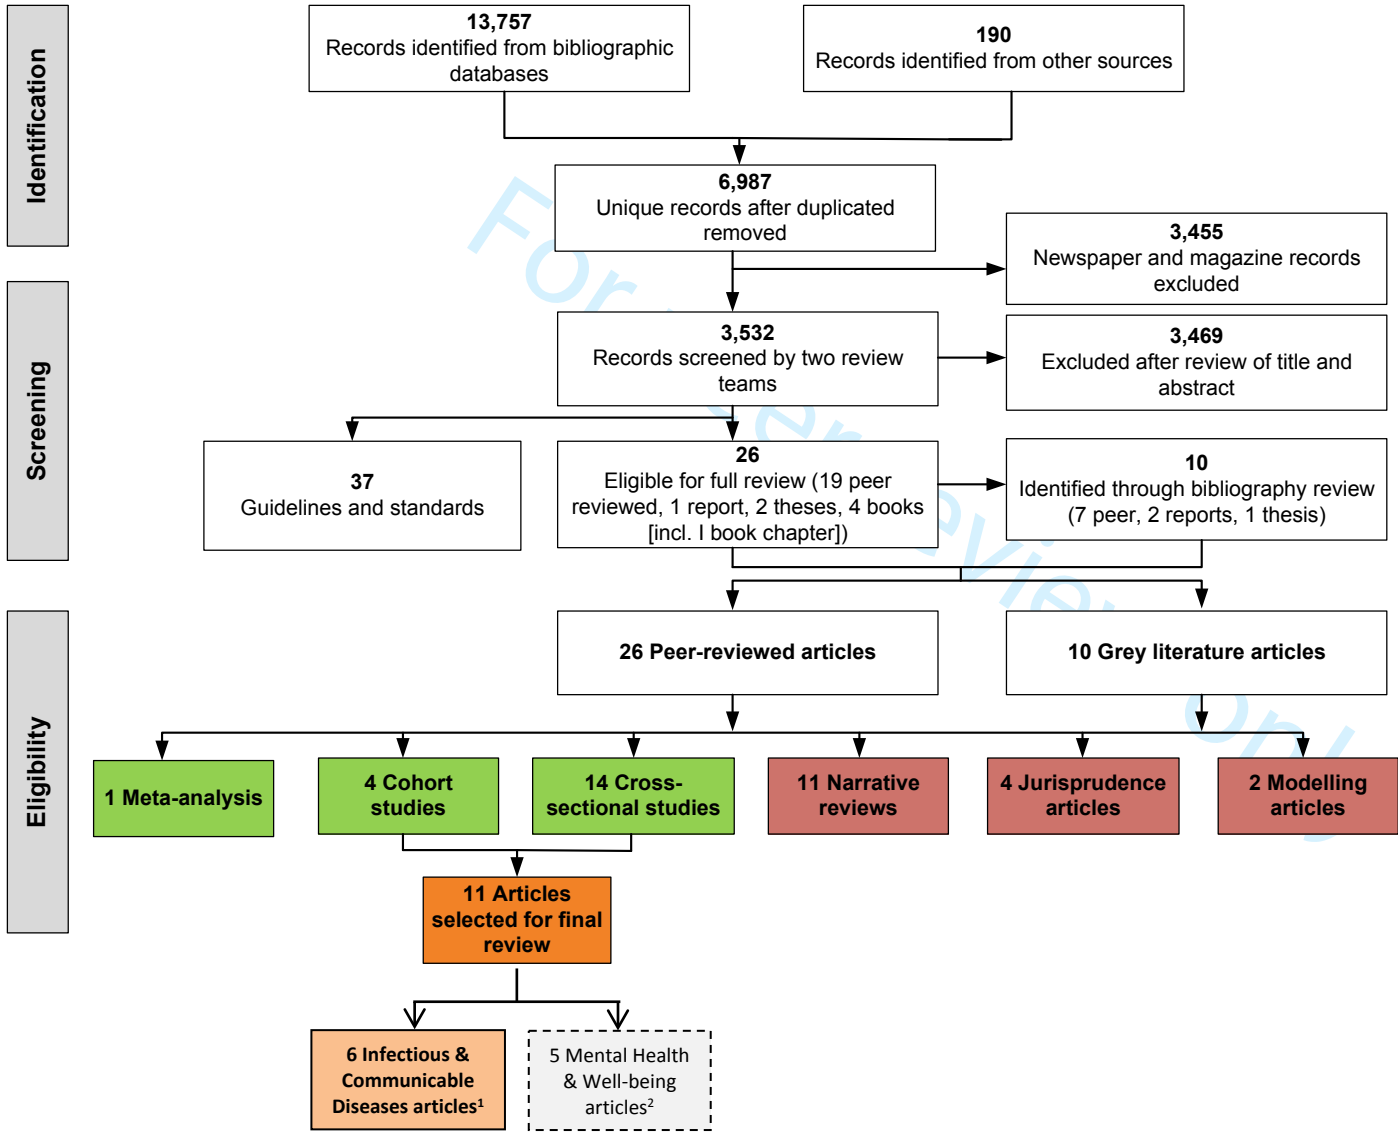

<sup>1</sup> Articles included for review

<sup>2</sup> Review of mental health and wellbeing articles reported elsewhere<sup>29</sup>

## Appendix A

### Components of the Body of Evidence Statement Form used in the review

| Component                                                                                                                                                                                                                                                                                                       | A                                                                                                       | B                                                                                                                           | C                                                                                                                               | D                                                                                                              |
|-----------------------------------------------------------------------------------------------------------------------------------------------------------------------------------------------------------------------------------------------------------------------------------------------------------------|---------------------------------------------------------------------------------------------------------|-----------------------------------------------------------------------------------------------------------------------------|---------------------------------------------------------------------------------------------------------------------------------|----------------------------------------------------------------------------------------------------------------|
|                                                                                                                                                                                                                                                                                                                 | Excellent                                                                                               | Good                                                                                                                        | Satisfactory                                                                                                                    | Poor                                                                                                           |
| Evidence base <sup>1</sup>                                                                                                                                                                                                                                                                                      | One of more level I studies with a low risk of bias or several level II studies with a low risk of bias | One or two level II studies with a low risk of bias or SR/several level III studies with a low risk of bias and confounding | One or two level III studies with a low risk of bias or level I or level II studies with a moderate risk of bias or confounding | Level IV studies or level III studies/SRs with a risk of bias and confounding                                  |
| Consistency                                                                                                                                                                                                                                                                                                     | All studies consistent                                                                                  | Most studies consistent and inconsistency can be explained                                                                  | Some inconsistency, reflecting genuine uncertainty around question                                                              | Evidence is inconsistent                                                                                       |
| Population health impact                                                                                                                                                                                                                                                                                        | Very large                                                                                              | Moderate                                                                                                                    | Slight                                                                                                                          | Restricted                                                                                                     |
| Generalisability                                                                                                                                                                                                                                                                                                | Evidence directly generalisable to target population                                                    | Evidence directly generalisable to target population with some caveats                                                      | Evidence not directly generalisable to the target population but could be sensibly applied                                      | Evidence not directly generalisable to the target population and hard to judge whether it is sensible to apply |
| <sup>1</sup> Evidence base level: systematic review of prospective cohort studies (level I), prospective cohort study (level II), 'all or none' study (level III-1) retrospective cohort study (level III-2), case-control study (level III-3), cross-sectional study, or case series (level IV). <sup>31</sup> |                                                                                                         |                                                                                                                             |                                                                                                                                 |                                                                                                                |

Source: NHMRC<sup>31</sup>



**Appendix B**Evidence Scale and Statement recommendations

| Evidence statement rating | Description                                                                                               |
|---------------------------|-----------------------------------------------------------------------------------------------------------|
| A                         | Findings from the body of evidence can be trusted                                                         |
| B                         | Findings from the body of evidence can be trusted in most situations                                      |
| C                         | The body of evidence provides some support but care should be taken in the interpretation of the findings |
| D                         | The body of evidence is weak and findings cannot be trusted                                               |

Source: NHMRC<sup>31</sup>

**PRISMA-P (Preferred Reporting Items for Systematic review and Meta-Analysis Protocols) 2015 checklist: recommended items to address in a systematic review protocol**

| Section and topic                 | Item No | Checklist item                                                                                                                                                                                                                | Location in manuscript                                                                                    |
|-----------------------------------|---------|-------------------------------------------------------------------------------------------------------------------------------------------------------------------------------------------------------------------------------|-----------------------------------------------------------------------------------------------------------|
| <b>ADMINISTRATIVE INFORMATION</b> |         |                                                                                                                                                                                                                               |                                                                                                           |
| Title:                            |         |                                                                                                                                                                                                                               |                                                                                                           |
| Identification                    | 1a      | Identify the report as a protocol of a systematic review                                                                                                                                                                      | See page 1                                                                                                |
| Update                            | 1b      | If the protocol is for an update of a previous systematic review, identify as such                                                                                                                                            | Not applicable                                                                                            |
| Registration                      | 2       | If registered, provide the name of the registry (such as PROSPERO) and registration number                                                                                                                                    | Not applicable                                                                                            |
| Authors:                          |         |                                                                                                                                                                                                                               |                                                                                                           |
| Contact                           | 3a      | Provide name, institutional affiliation, e-mail address of all protocol authors; provide physical mailing address of corresponding author                                                                                     | See title page; see entry on Manuscript Central for email addresses                                       |
| Contributions                     | 3b      | Describe contributions of protocol authors and identify the guarantor of the review                                                                                                                                           | See title page and Contributions section (page 17)                                                        |
| Amendments                        | 4       | If the protocol represents an amendment of a previously completed or published protocol, identify as such and list changes; otherwise, state plan for documenting important protocol amendments                               | Not applicable                                                                                            |
| Support:                          |         |                                                                                                                                                                                                                               |                                                                                                           |
| Sources                           | 5a      | Indicate sources of financial or other support for the review                                                                                                                                                                 | See Funding section on (page 17)                                                                          |
| Sponsor                           | 5b      | Provide name for the review funder and/or sponsor                                                                                                                                                                             | See Funding section on (page 17)                                                                          |
| Role of sponsor or funder         | 5c      | Describe roles of funder(s), sponsor(s), and/or institution(s), if any, in developing the protocol                                                                                                                            | See Funding section on (page 17-18)                                                                       |
| <b>INTRODUCTION</b>               |         |                                                                                                                                                                                                                               |                                                                                                           |
| Rationale                         | 6       | Describe the rationale for the review in the context of what is already known                                                                                                                                                 | See Introduction section (pages 3-4)                                                                      |
| Objectives                        | 7       | Provide an explicit statement of the question(s) the review will address with reference to participants, interventions, comparators, and outcomes (PICO)                                                                      | See final paragraph before Method section (page 5)                                                        |
| <b>METHODS</b>                    |         |                                                                                                                                                                                                                               |                                                                                                           |
| Eligibility criteria              | 8       | Specify the study characteristics (such as PICO, study design, setting, time frame) and report characteristics (such as years considered, language, publication status) to be used as criteria for eligibility for the review | See Methods section (Search strategy and selection criteria and Study eligibility subsections, pages 6-7) |
| Information sources               | 9       | Describe all intended information sources (such as electronic databases, contact with study authors, trial registers or other grey literature sources) with planned dates of coverage                                         | See Methods section (Search strategy and selection criteria subsection, pages 6-7)                        |
| Search strategy                   | 10      | Present draft of search strategy to be used for at least one electronic database, including planned limits,                                                                                                                   | See Table 2                                                                                               |

|                                    |     |                                                                                                                                                                                                                                                  |                                                                                    |
|------------------------------------|-----|--------------------------------------------------------------------------------------------------------------------------------------------------------------------------------------------------------------------------------------------------|------------------------------------------------------------------------------------|
|                                    |     | such that it could be repeated                                                                                                                                                                                                                   |                                                                                    |
| Study records:                     |     |                                                                                                                                                                                                                                                  |                                                                                    |
| Data management                    | 11a | Describe the mechanism(s) that will be used to manage records and data throughout the review                                                                                                                                                     | See Methods section (page 7)                                                       |
| Selection process                  | 11b | State the process that will be used for selecting studies (such as two independent reviewers) through each phase of the review (that is, screening, eligibility and inclusion in meta-analysis)                                                  | See Methods section (Study eligibility subsection, pages 7-8)                      |
| Data collection process            | 11c | Describe planned method of extracting data from reports (such as piloting forms, done independently, in duplicate), any processes for obtaining and confirming data from investigators                                                           | See Methods section (Critical appraisal of eligible studies subsection, page 8)    |
| Data items                         | 12  | List and define all variables for which data will be sought (such as PICO items, funding sources), any pre-planned data assumptions and simplifications                                                                                          | See Methods section (Critical appraisal of eligible studies subsection, page 8)    |
| Outcomes and prioritization        | 13  | List and define all outcomes for which data will be sought, including prioritization of main and additional outcomes, with rationale                                                                                                             | See Methods section (Search strategy and selection criteria subsection, pages 6)   |
| Risk of bias in individual studies | 14  | Describe anticipated methods for assessing risk of bias of individual studies, including whether this will be done at the outcome or study level, or both; state how this information will be used in data synthesis                             | See Methods section (Critical appraisal of eligible studies subsection, pages 8-9) |
| Data synthesis                     | 15a | Describe criteria under which study data will be quantitatively synthesised                                                                                                                                                                      | Not applicable                                                                     |
|                                    | 15b | If data are appropriate for quantitative synthesis, describe planned summary measures, methods of handling data and methods of combining data from studies, including any planned exploration of consistency (such as $I^2$ , Kendall's $\tau$ ) | Not applicable                                                                     |
|                                    | 15c | Describe any proposed additional analyses (such as sensitivity or subgroup analyses, meta-regression)                                                                                                                                            | Not applicable                                                                     |
|                                    | 15d | If quantitative synthesis is not appropriate, describe the type of summary planned                                                                                                                                                               | See Methods section (Critical appraisal of eligible studies subsection, pages 8-9) |
| Meta-bias(es)                      | 16  | Specify any planned assessment of meta-bias(es) (such as publication bias across studies, selective reporting within studies)                                                                                                                    | See Discussion section (page 13)                                                   |
| Confidence in cumulative evidence  | 17  | Describe how the strength of the body of evidence will be assessed (such as GRADE)                                                                                                                                                               | See Methods section (Critical appraisal of eligible studies subsection, pages 8-9) |

From: Shamseer L, Moher D, Clarke M, Ghersi D, Liberati A, Petticrew M, Shekelle P, Stewart L, PRISMA-P Group. Preferred reporting items for systematic review and meta-analysis protocols (PRISMA-P) 2015: elaboration and explanation. *BMJ*. 2015 Jan 2;349(jan02 1):g7647.

# BMJ Open

## Prison cell spatial density and infectious and communicable diseases: a systematic review

|                                 |                                                                                                                                                                                                                                                                                                                                                                                                       |
|---------------------------------|-------------------------------------------------------------------------------------------------------------------------------------------------------------------------------------------------------------------------------------------------------------------------------------------------------------------------------------------------------------------------------------------------------|
| Journal:                        | <i>BMJ Open</i>                                                                                                                                                                                                                                                                                                                                                                                       |
| Manuscript ID                   | bmjopen-2018-026806.R1                                                                                                                                                                                                                                                                                                                                                                                |
| Article Type:                   | Research                                                                                                                                                                                                                                                                                                                                                                                              |
| Date Submitted by the Author:   | 09-Apr-2019                                                                                                                                                                                                                                                                                                                                                                                           |
| Complete List of Authors:       | Simpson, Paul; University of New South Wales - Randwick Campus, Kirby Institute<br>Simpson, Melanie; Juvenile Justice New South Wales<br>Adily, Armita; University of New South Wales - Randwick Campus, Kirby Institute<br>Grant, Luke; New South Wales Department of Justice, Corrective Services New South Wales<br>Butler, Tony; University of New South Wales - Randwick Campus, Kirby Institute |
| <b>Primary Subject Heading</b>: | Infectious diseases                                                                                                                                                                                                                                                                                                                                                                                   |
| Secondary Subject Heading:      | Public health                                                                                                                                                                                                                                                                                                                                                                                         |
| Keywords:                       | Communicable Diseases, Public health < INFECTIOUS DISEASES, Prisons, Prisoners, Crowding, Spatial Density                                                                                                                                                                                                                                                                                             |
|                                 |                                                                                                                                                                                                                                                                                                                                                                                                       |

SCHOLARONE™  
Manuscripts

1  
2  
3 **Prison cell spatial density and infectious and communicable diseases: a systematic**  
4 **review**  
5  
6  
7

8 Paul L Simpson, Melanie Simpson, Armita Adily, Luke Grant, Tony G Butler  
9

10  
11 Kirby Institute, Wallace Wurth Building UNSW Sydney, 2052, Australia, Paul L Simpson  
12 research fellow Juvenile Justice New South Wales, Henry Deane Building, 20 Lee Street,  
13 Sydney, 2000, Australia, Melanie Simpson project officer Kirby Institute, Wallace Wurth  
14 Building UNSW Sydney, 2052, Australia, Armita Adily research fellow Corrective Services  
15 New South Wales, Henry Deane Building, 20 Lee Street, Sydney, 2000, Australia Luke Grant  
16 assistant commissioner Kirby Institute, Wallace Wurth Building UNSW Sydney, 2052,  
17 Australia, Tony G Butler professor  
18  
19

20  
21  
22 Correspondence to: PL Simpson [psimpson@kirby.unsw.edu.au](mailto:psimpson@kirby.unsw.edu.au)  
23  
24  
25  
26  
27  
28  
29  
30  
31  
32  
33  
34  
35  
36  
37  
38  
39  
40  
41  
42  
43  
44  
45  
46  
47  
48  
49  
50  
51  
52  
53  
54  
55  
56  
57  
58  
59  
60

## Prison cell spatial density and infectious and communicable diseases: a systematic review

**Objective:** To summarise the extent and quality of evidence on the association between prison cell spatial density (a measure of crowding) and infectious and communicable diseases transmission among prisoners.

**Design:** Systematic review.

**Data sources:** Embase, PubMed, Medline, Scopus, Web of Science, PsycInfo, PsycExtra, Proquest Databases, Proquest Dissertations and Theses Global, Index to Legal Periodicals, Informit Online, Cochrane Library, Criminal Justice Abstracts and ICONDA were searched to 31 December 2018.

**Eligibility Criteria:** Studies that reported on the association between prison cell spatial density (measured in square feet or square metres of cell floor area per person) and infectious and communicable diseases in juvenile and adult populations incarcerated in a correctional facility.

**Data extraction and synthesis:** A review protocol was developed in consultation with an advisory panel. Two reviewers independently extracted data and used the Australian National Health and Medical Research Council's (NHMRC) checklist to critically appraise individual studies. An assessment of the overall body of the evidence was conducted using the NHMRC's Evidence Scale and Statement Form.

**Results:** A total of 5,126 articles were initially identified with seven included in the review from Pakistan (2003), Chile (2016), Nigeria (2012, 2013) and the United States (1980s). Infectious and communicable disease outcomes included pneumococcal disease/acute pneumonia, mycobacterium tuberculosis, latent tuberculosis infection, infectious skin conditions, and contagious disease reporting to the prison clinic. Five articles reported statistically significant positive associations but were countered by associations possibly being explained by chance, bias or confounding factors. Heterogeneity prevented meta-analysis.

**Conclusion:** Overall, the body of evidence provides some support for an association between prison cell special density and infectious and communicable diseases, but care should be taken in the interpretation and transferability of the findings. Future research and policy responses should adequately consider prospective mediating factors implicated in associations between cell spatial density and health effects.

**Key words:** Communicable Diseases; Infectious Diseases; Prisons; Prisoners; Crowding; Spatial Density

### Strengths and limitations of this study

- This is the first systematic review of the association between prison cell spatial density (a measure of crowding) and infectious and communicable diseases.
- We used an expert advisory panel to guide review protocols and the Australian National Health and Research Council frameworks to evaluate the strength and quality of the evidence.
- Most included studies had incomplete reporting of methodology and findings.
- This review was limited by the small number of studies in this area and the heterogeneity of study design.

## Introduction

Globally, the number of prisoners is increasing. Two percent above world population growth,<sup>1</sup> since the year 2000 the world's prisoner population has grown by approximately 20%, imposing a significant financial burden on society and having profound social and health consequences.<sup>2</sup> More than 11 million people are held in penal institutions globally, either as remand (pre-trial detainees) or convicted prisoners. Currently, seventeen countries in the world have an incarceration rate of more than 400 per 100,000 population in prison. The United States (US) is the largest incarcerator, accounting for approximately 20% of the world's prisoners with an incarceration rate of 655 per 100,000 population.<sup>3</sup>

A rising prison population without a corresponding expansion of infrastructure has raised health concerns in many countries over prison crowding,<sup>3</sup> making prison cell size a key public health issue. For example, in the Australian state of New South Wales (NSW), prison cell size as a public health issue emerged in recent times with the publication of the Inspector of Custodial Services' report Full House: the growth of the inmate population in NSW<sup>4</sup>, the increase in the prisoner population, and the issue that a significant number of prison cells did not meet public health regulations on the minimum floor area requirements per prisoner. Historically, Corrective Services NSW had been exempted from such regulation provided a range of conditions imposed by the NSW Ministry of Health were met. In 2012, the Ministry required the NSW Department of Justice, Corrective Services to engage an independent [from Corrective Services] group to review the international literature on prison cell crowding and adverse health effects, a review of the international cell size guidelines, and a review of health surveillance data to advise the Ministers for Health and Justice.

Close physical proximity in confined spaces such as in prisons has been reported to be associated with an increased risk of infectious and communicable disease transmission including, mycobacterium tuberculosis, scabies, pneumococcus, meningococcus and



1  
2  
3 influenza.<sup>5-7</sup> Rates of infectious diseases in prisons, particularly blood-borne viral infections  
4 (HIV and viral hepatitis) and airborne infections such as mycobacterium tuberculosis are  
5 typically higher than in the general community which exacerbates the risk of disease  
6 transmission.<sup>6,8,9</sup> Additionally, it has been suggested that the close physical proximity in  
7 prisons may induce psychological stress or intensify the existing stressful conditions in a  
8 prison<sup>10,11</sup> leading to alterations in immune and cardiovascular functions.<sup>12</sup>  
9  
10  
11  
12  
13  
14  
15  
16

17 The concept of crowding is understood in the academic literature and legislation as a  
18 mechanism that impacts adversely on the health and well-being of prisoners. Reports on prison  
19 conditions, prison standards and guidelines by international and regional agencies cite prison  
20 crowding as major health and human rights concerns impacting on this population.<sup>13-17</sup> Left  
21 untreated in prison, the risk of disease transmission to family, friends, intimate partners, and  
22 other community members is likely upon leaving prison and returning to general society.<sup>18-22</sup>  
23  
24  
25  
26  
27  
28  
29  
30

31 Despite decades of research dedicated to prison conditions and its impact on health,  
32 there has been no systematic review to assess the quality of evidence of the association between  
33 prison crowding and infectious and communicable disease transmission. A lack of consensus  
34 exists on the best way to conceptualise and measure the essential element(s) of crowding with  
35 the debate centring on the need for objective versus subjective measurements of crowding.<sup>23,24</sup>  
36 The latter focuses on the individual experience or perception of crowding using subjective  
37 ratings of conditions such as behavioural constraints, stimulus and cognitive overload, privacy,  
38 desire to augment space, and loss of environmental control.<sup>12,25,26</sup> The former, objective  
39 measures of prison crowding vary, but commonly revolve around metrics of prisoners per  
40 allocation of space to derive a measure of density (Table 1).  
41  
42  
43  
44  
45  
46  
47  
48  
49  
50  
51  
52  
53  
54  
55  
56  
57  
58  
59  
60

Table 1. Objective prison crowding measures identified in the literature

| Measure                                                                                                               | Example of study utilising measure       |
|-----------------------------------------------------------------------------------------------------------------------|------------------------------------------|
| i. Prisoner population divided by the design capacity of the prison                                                   | McCorkle et al, 1995 <sup>27</sup>       |
| ii. Prisoner population divided by the rated capacity of the prison                                                   | Tartaro, 2002 <sup>28</sup>              |
| iii. Percentage of prison cells or dormitories reported as overcrowded by the institution                             | Anson, 1984 <sup>29</sup>                |
| iv. Prisoner population divided by the total number of available beds                                                 | Bonta & Kiem, 1978 <sup>30</sup>         |
| v. Number of prisoners per prison                                                                                     | Ruback & Carr, 1984 <sup>31</sup>        |
| vi. Number of prisoners per living space/cell unit (including communal areas)                                         | Atlas, 1982 <sup>32</sup>                |
| vii. Number of prisoners per cell                                                                                     | Urrego et al, 2015 <sup>33</sup>         |
| viii. Number of square metres of the total prison floor area per person                                               | Ekland-Olsen et al, 1983 <sup>34</sup>   |
| ix. Number of square metres of the total living space/cell unit of the prisoner (including communal areas) per person | Megargee, 1977 <sup>35</sup>             |
| x. Number of square metres of the cell per person                                                                     | McCain, Cox & Paulus, 1976 <sup>36</sup> |

Some of these measures have been criticised as being amenable to manipulation by prison authorities and thus regarded as invalid measures of prison crowding.<sup>37,24</sup> Measures iv. to x. (Table 1) are regarded as objective measures of social and spatial density. *Social density* refers to the number of people in a defined area of the prison (e.g. the whole facility, wing, dormitory, or cell). *Spatial density* refers to the floor area of a defined area (e.g. entire prison or cell) divided by the number of people in that space<sup>11</sup>. Social and spatial densities are often dependent on one another, such as when the cell occupancy level increases, this causes a corresponding increase in both social density and spatial density. In this review, the area (measured in square feet or square metres) of the cell per person was selected as the cell crowding measure and is referred to as *cell spatial density*. This measure was adopted for two reasons. Firstly, the lack of consensus in the academic literature on the conceptualisation and measurement of crowding impressed the need to define cell crowding as an objectively defined environmental factor. Secondly, an examination of international guidelines on prison

1  
2  
3 conditions and standards over the last half a century has seen a shift towards standards based  
4 on cell spatial density (see Simpson, Simpson and Butler, 2016). Cell spatial density as a metric  
5 has also entered the legislative domain such as in the Australian Capital Territory's *Human*  
6 *Rights Act 2004* which recommends 8.9m<sup>2</sup> for single cells and 10.7m<sup>2</sup> for double cells.<sup>16</sup>  
7  
8  
9

10  
11  
12 To determine the extent and quality of evidence on the association between prison cell  
13 crowding and health impacts, Kirby Institute researchers and authors (PLS, MS, AA and TGB)  
14 were commissioned by the New South Wales Department of Justice, Correctives Services to  
15 conduct a systematic review of studies that analysed the association between prison cell spatial  
16 density and prisoner infectious and communicable diseases and mental health and well-being  
17 outcomes. In this paper we present the results of our review of the association between cell  
18 spatial density and prisoner infectious and communicable disease effects, expressed in terms  
19 of the evidence of this association and the quality of the evidence.  
20  
21  
22  
23  
24  
25  
26  
27  
28  
29

### 30 31 **Methods**

32  
33 Under the direction of the NSW Ministry of Health and the NSW Department of Justice, an  
34 expert advisory panel was formed to guide the review comprising infectious diseases experts,  
35 public health professionals, academic staff and custodial administrators. A review protocol was  
36 developed following consultations with the advisory panel covering search strategy and  
37 selection criteria and study eligibility and appraisal. The Preferred Reporting Items for  
38 Systematic Reviews and Meta-Analyses (PRISMA) Guidelines was adopted for the review.<sup>38</sup>  
39  
40  
41  
42  
43  
44  
45

### 46 47 ***Search strategy and selection criteria***

48  
49 A search string was agreed to identify articles on the association between cell spatial density  
50 and infectious and communicable diseases and mental health outcomes (Table 2). For the  
51 present paper, articles reporting on infectious and communicable disease outcomes were  
52 extracted from the final list of eligible studies. Review of the mental health outcome studies  
53 are reported elsewhere.<sup>39</sup> Infectious and communicable diseases are defined 'as an illness due  
54  
55  
56  
57  
58  
59  
60

1  
2  
3 to a specific infectious agent or its toxic products that arises through transmission of such agent  
4  
5 or products from an infected person, animal, or reservoir to a susceptible host, either directly  
6  
7 or indirectly through an intermediate plant or animal host, vector or inanimate environment'.<sup>40</sup>  
8  
9

10 The scope of the search was limited to the availability of an English abstract and to  
11  
12 human subjects. Publication date was not restricted. Studies were excluded if they did not  
13  
14 specify cell size or a measurement of cell spatial density, examined only temporary  
15  
16 accommodation within custodial settings such as segregation cells, police cells, lockups, prison  
17  
18 transport/transfer units, and prison clinic accommodation. Studies examining combined living  
19  
20 and sleeping space preventing the differentiation of sleeping space were also excluded from  
21  
22 the current review.  
23  
24  
25

26 Fourteen medical, social science and architectural databases were searched: EMBASE  
27  
28 (1947-2018), PubMed (≈1800-2018), Medline (1946-2018), Scopus (1976-2018), PsycInfo  
29  
30 (1806-2018), PsycExtra (1908-2018), Web of Science (1900-2018), Proquest Databases (1763-  
31  
32 2018), Proquest Dissertations and Theses Global (1716-2018), Index to Legal Periodicals  
33  
34 (1985-2018), Informit Online (1920-2018), Cochrane Library (≈1900-2018), Criminal Justice  
35  
36 Abstracts (1910-2018) and ICONDA (1976-2018). Grey literature was also identified from  
37  
38 these database searches; and a further search for grey literature was conducted using Google  
39  
40 and selected websites including those of the United Nations, International Committee of the  
41  
42 Red Cross, Amnesty International, International Centre for Prison Studies, World Health  
43  
44 Organization, Campbell Collaboration, the Criminal Justice Reference Service, the United  
45  
46 States' (US) National Library of Medicine and websites of the Australian Inspector of  
47  
48 Custodial Services. A number of international experts in the prisoner health area were  
49  
50 contacted to inquire as to whether they were aware of additional material of potential interest  
51  
52 to the review.  
53  
54  
55  
56  
57  
58  
59  
60

To manage records identified, articles were exported from databases into EndNote X7.1. Grey literature from non-database sources were entered into Endnote manually. PDF versions of articles were located and attached to Endnote items.

Table 2. Search terms used to identify evidence to inform the systematic review (example for PubMed database)

|                                                                                        |                                                                                                                                                                                                                                                                                                                                                                                                                                                                                                                                                                                                                                                                                                                                                                                                                                         |
|----------------------------------------------------------------------------------------|-----------------------------------------------------------------------------------------------------------------------------------------------------------------------------------------------------------------------------------------------------------------------------------------------------------------------------------------------------------------------------------------------------------------------------------------------------------------------------------------------------------------------------------------------------------------------------------------------------------------------------------------------------------------------------------------------------------------------------------------------------------------------------------------------------------------------------------------|
|                                                                                        | Academic databases                                                                                                                                                                                                                                                                                                                                                                                                                                                                                                                                                                                                                                                                                                                                                                                                                      |
| Search terms                                                                           | <p>prison OR “corrective service*” OR “correctional cent*” OR “correctional complex” OR “correctional facilit*” OR borstal OR jail* OR gaol* OR penitentiary OR “detention cent*” OR custody OR custodial OR “closed setting*” AND</p> <p>accommodation OR cell OR room OR cubicle OR dormitory OR *crowding OR “social density” OR “spatial density” AND</p> <p>health OR illness OR sickn* OR infectio* OR transmissi* OR disease* OR hepatitis OR HIV OR tuberculosis OR parasite* OR bacteria* OR virus OR viral OR influenz* OR gastroent* OR disorder OR depressi* OR stress OR anxiety OR aggression OR irritability OR violence OR self-harm OR suicide OR well-being OR wellbeing AND</p> <p>prisoner* OR inmate* OR incarcerated OR criminal* OR felon* OR remandee* OR delinquent* OR detainee* OR convict* OR cellmate*</p> |
|                                                                                        | Targeted grey literature                                                                                                                                                                                                                                                                                                                                                                                                                                                                                                                                                                                                                                                                                                                                                                                                                |
| Search terms <sup>#</sup>                                                              | Prison cell and health effects, prison cell and health, jail cell and health, jail cell and health effects, prison cell and health and size, jail cell and health and size                                                                                                                                                                                                                                                                                                                                                                                                                                                                                                                                                                                                                                                              |
| <sup>#</sup> Search terms varied according to website, only some examples are provided |                                                                                                                                                                                                                                                                                                                                                                                                                                                                                                                                                                                                                                                                                                                                                                                                                                         |

### ***Study eligibility***

All publications identified by the search were first screened by two independent teams of two reviewers (PLS, AA, and MS, LY). To ensure consistency in the screening process and selection of eligible studies across the teams, titles and abstracts of the first 100 studies were independently reviewed by both teams and discussed as a group to ensure consistency. After achieving a consensus on eligibility for full text review across both teams, the remaining articles were divided between the two teams of reviewers. Each person within the team independently reviewed their assigned literature, and upon finishing, discussed the eligibility outcome with the other team member. In those instances where there was disagreement within a team, both teams met to resolve the issues and decide through consensus if the article was eligible for full text review.

Articles were excluded from full text review if the study design did not feature in the Australian National Health and Medical Research Council's (NHMRC) Hierarchy of Evidence.<sup>41</sup> This hierarchy includes systematic reviews of prospective cohort studies (level I evidence), prospective cohort study (level II evidence), 'all or none' study (i.e. either all or none of the people with the risk factor(s) experienced the outcome of interest) (level III-1 evidence) retrospective cohort study (level III-2 evidence), case-control study (level III-3 evidence), or cross-sectional study or case series (level IV evidence).<sup>41</sup> Articles were also excluded if they did not conduct an analysis that examined the relationship between the exposure variable of prison cells accommodating one or more persons with a specified cell spatial density or cell dimensions and an outcome variable of an infectious and/or communicable disease.

### ***Critical appraisal of eligible studies***

Critical appraisal of eligible studies involved three stages: (i) data extraction,<sup>42</sup> (ii) assessment of bias, chance and confounding,<sup>43</sup> and (iii) an aggregated assessment of all studies using the

1  
2  
3 NHMRC FORM Matrix and Evidence Statement to produce a final rating and evidence  
4  
5 statement.<sup>41</sup>  
6  
7

8 An adapted version of the NHMRC's standardised data summary table was used to  
9  
10 extract data.<sup>42</sup> Data extraction tables were prepared and cross-checked by two independent  
11  
12 reviewers (PLS, MS). Extracted information included: general study details (citation, study  
13  
14 design, length of follow-up, level of evidence, and location and setting); study exposure and  
15  
16 control descriptions; population characteristics; internal and external validity considerations;  
17  
18 and study outcomes and results.  
19  
20

21 Assessment of bias, chance and confounding was guided by the NHMRC's checklist to  
22  
23 critically appraise aetiology or risk factor studies.<sup>43</sup> Checklist items used to guide the  
24  
25 assessment of studies included: exposure misclassification; outcome misclassification;  
26  
27 selection bias; confounding; and chance. Items were assessed on one of two 3-point scales: low  
28  
29 (0), medium (1), high (2) risk; or poor (0), fair (1), good (2).  
30  
31  
32

33 A systematic assessment of the overall body of the evidence was conducted using a  
34  
35 modified (for study population relevance) NHMRC FORM Matrix and Evidence Statement  
36  
37 covering:<sup>31</sup> 1) evidence base; 2) consistency of results; 3) population health impact; and 4)  
38  
39 generalisability. Each component was rated from Excellent to Poor (Appendix A) to allow a  
40  
41 final overall rating and evidence statement to be derived ranging from 'A' to 'D': 'A' indicating  
42  
43 that the body of evidence can be trusted to 'D' indicating that the body of evidence is weak,  
44  
45 and findings cannot be trusted. (Appendix B).<sup>41</sup> The final overall rating and evidence statement  
46  
47 were undertaken by one reviewer (PLS) and cross-checked by another (MS).  
48  
49  
50

51 Following the completion of the review by the team, an expert, independent of the  
52  
53 reviewers and advisory panel, peer reviewed the methodology and findings.  
54  
55  
56

### 57 ***Patient and public involvement***

58  
59 Patients and the public were not involved in the review.  
60

## Results

After removing duplicate records and newspaper and magazine articles, a total of 5,126 records were assessed for eligibility based on publication title and abstract content (Figure 1). As a result of this screening, 41 records that reported on infectious and communicable diseases and/or mental health outcomes were identified for full text review. For the present review, seven publications met the inclusion criteria for infectious and communicable disease outcomes; five articles were published in peer-reviewed journals<sup>44-48</sup> and two were reports.<sup>37,49</sup> Two articles related to the same research program on prison crowding;<sup>37,49</sup> two articles derived from the same study on infectious skin conditions.<sup>46-47</sup> Five articles examined the association between cell spatial density and pneumococcal disease or acute pneumonia,<sup>44</sup> mycobacterium tuberculosis (MTB),<sup>45</sup> latent tuberculosis infection (LTBI),<sup>48</sup> and infectious skin conditions,<sup>46-47</sup> respectively, while two articles reported on communicable illness presentation to the prison clinic.<sup>37,48</sup> Three studies were conducted in the United States of America (US),<sup>37,44,49</sup> two in Nigeria,<sup>46,47</sup> one in Chile<sup>48</sup> and one in Pakistan (Table 3).<sup>45</sup> Meta-analysis was not possible due to heterogeneity and incomplete reporting of findings. Measures of effect reported in the six publications varied and included odds ratio, risk ratio, and mean and group differences.

Six studies were cross-sectional in design (level IV aetiology evidence) and one included both a case-control and cohort study design reported in the same article (level III-3/III-2 aetiology evidence). Outcome measures for the pneumococcal disease<sup>44</sup> and MTB<sup>45</sup> studies were measured using a standardised and reliable approach [tuberculin sensitivity test (TST) using the Mantoux method, culture from blood, pleural or spinal fluid specimen, and radiograph]. LTBI was measured using Interferon-Gamma Release Assays (IGRAs) and those found to be IGRA-positive underwent direct sputum smear microscopy and chest radiography to diagnose active TB or LTBI.<sup>48</sup> Two articles measured infectious skin conditions<sup>46,47</sup> 'in part' in a standardised and reliable way (clinical examination of the body by a consultant



1  
2  
3 dermatologist and venereologist). The validity and reliability of the outcome measure for the  
4 two studies examining communicable illness presentations to a prison clinic,<sup>37,49</sup> was deemed  
5 poor. This is because presentations to a prison clinic may additionally capture other parameters  
6 of health service use besides and beyond health effects such as, dispositional characteristics of  
7 prisoners and the administration of medical care in the prison.<sup>49</sup>  
8  
9  
10  
11  
12  
13

14 Although the sampling framework was described well in most studies, the sampling  
15 method was absent in two articles<sup>46,47</sup> and response rates were not reported in four  
16 articles.<sup>37,46,47,49</sup> Self-report measures were used in six studies to determine potential  
17 confounders such as underlying medical conditions and demographic information, therefore  
18 recall bias is a possibility. With the exception of the case-control and cohort studies (case-  
19 control: N=25 cases/75 controls; cohort: N=46),<sup>44</sup> sample sizes were relatively similar across  
20 the five cross-sectional studies (N=289-428). Four studies considered or adjusted for  
21 confounding factors or effect modifiers in the analyses;<sup>37,45,48,49</sup> two studies did not,<sup>46,47</sup> and it  
22 is unclear whether multivariate analysis was conducted in one study.<sup>44</sup>  
23  
24  
25  
26  
27  
28  
29  
30  
31  
32  
33  
34

### 35 ***Evidence of an association between cell spatial density and infectious and communicable*** 36 ***diseases*** 37 38

39 While the review found mostly consistent evidence that cell spatial density is associated  
40 with clinically verifiable infectious and communicable diseases, with five articles reporting a  
41 statistically significant association between cell spatial density and infectious and  
42 communicable diseases (Table 3), all but one of these associations could possibly be explained  
43 by chance, study bias or confounding.  
44  
45  
46  
47  
48  
49  
50

51 In the study which investigated MTB infection in a random sample of 425 male  
52 prisoners in five Pakistan prisons, the association between cell spatial density and MTB was  
53 reported to be statistically significant (aOR 2.6; 95%CI: 1.6, 4.3) after adjusting for age,  
54 education, length of incarceration, tobacco use and other variables.<sup>45</sup> However, caution is  
55  
56  
57  
58  
59  
60

1  
2  
3 warranted when interpreting this result due to the possible exposure and outcome  
4 misclassification. That is, the cell spatial density measure was a dichotomised average floor  
5 area per person (i.e.  $>5.6\text{m}^2$  per person and  $\leq 5.6\text{m}^2$  per person) and thus may be a crude  
6 measure. The study does not report on how this measure was determined. Additionally, the  
7  
8 100% response rate to the screening suggests possible coercion to participate in the study that  
9  
10 may have affected the reliability of self-report data ta (e.g. household income, occupation).  
11  
12  
13  
14  
15

16  
17 The LBTI study was conducted in 46 prisons in Chile and included 418 prisoner and  
18 non-prisoner contacts of 33 active TB cases recruited 12 months following the identification  
19 of active TB cases.<sup>48</sup> The study found high TB incidence (123.9 per 100 000 prisoners) and  
20 high LTBI prevalence (29.4%) among contacts, with LTBI rates significantly higher in  
21 prisoners than in non-prisoners (33.2% vs. 15.6%). Multivariate analyses showed a significant  
22 association between cell spatial density and LBTI (aOR 3.5; 95%CI: 1.1, 11.5) after adjusting  
23 for gender, age, illicit drug use, history of corticosteroid use and malnutrition, and length of  
24 incarceration. Assessing the extent of potential exposure misclassification was difficult as the  
25 spatial density measure used in analysis is not reported (unclear if continuous or categorical  
26 variable used). Cell type (i.e. multiple-person cells, dormitories) across the different prisons  
27 was also not reported.  
28  
29  
30  
31  
32  
33  
34  
35  
36  
37  
38  
39  
40  
41

42 One US' study investigating a pneumococcal disease outbreak<sup>44</sup> examined the disease  
43 attack rate and its association with cell spatial density. Although more clarity and consistency  
44 in reporting of the analysis is needed to properly assess the findings, the results indicate that  
45 the attack rate was highest in 4-person cells ( $2.9\text{m}^2$  per person) compared with the two other  
46 cell types described (single cells at  $4.2\text{m}^2$  per person and open dormitories at  $2.6\text{m}^2$  per person).  
47 The study also reports that detainees housed in shared and single areas  $\geq 7.4\text{m}^2$  per person (8%  
48 of the inmate population) had significantly fewer cases of pneumococcal disease than all other  
49 detainees (attack rate: 0 vs. 4.7 per 1000 persons;  $p=0.03$ ). This lower attack rate for detainees  
50  
51  
52  
53  
54  
55  
56  
57  
58  
59  
60

1  
2  
3 housed in shared areas  $\geq 7.4\text{m}^2$  per person may in part be explained by time spent outside cells  
4 as those housed in this area were engaged in work programs and left their cells to undertake  
5 such work. Results were inconsistently reported across cell types with both univariate and  
6 adjusted odds ratios reported for the different cell types suggesting that some results were  
7 adjusted for and some not.  
8  
9

10  
11  
12  
13  
14 In the two studies conducted with mostly male (97%) prisoners in Nigeria, the  
15 prevalence of infectious and non-infectious skin conditions among prisoners living in single  
16 cells ( $0.9\text{m}^2$  per person) and dormitories ( $2.4\text{m}^2$  per person) was significantly different at 61.7%  
17 vs. 43.2%<sup>46</sup> and 82.9% vs. 69.7%.<sup>46,47</sup> However, the quality for these studies was assessed as  
18 ‘poor’ due to the absence of any multivariate analysis, no details of whether those conducting  
19 the physical examinations were blinded to the cell assignments of the prisoners, no response  
20 rates or sampling method described, and cell type details derived from self-report  
21 questionnaires.  
22  
23  
24  
25  
26  
27  
28  
29  
30  
31  
32

33 Two other US’ articles reporting on the association between cell spatial density and  
34 illness reporting at the prison clinic were from a research program spanning approximately ten  
35 years reporting on data collected from 1,400 prisoners from six federal prisons.<sup>37,49</sup> Illness  
36 reporting rates were determined by dividing the number of days a participant was in a cell type  
37 (with a specific cell social or spatial density) by the number of visits to a clinic. Not all  
38 outcomes were measured at and/or reported for all prison sites, and prisoner population  
39 characteristics, sampling methods, response rates and analytical procedures are not consistently  
40 reported across and within publications. One article, the Danbury prison study, reported results  
41 on illness reporting by contagious status,<sup>37</sup> covering: venereal disease; eye, ear, nose, throat  
42 infections; cough, cold, flu; gastrointestinal, stomach problems; skin conditions; virus; chills  
43 and fever. However, the lack of detail on the statistical analysis means it is unclear if potential  
44 confounders and effect modifiers were adjusted for. Nonetheless, the findings reported a  
45  
46  
47  
48  
49  
50  
51  
52  
53  
54  
55  
56  
57  
58  
59  
60

1  
2  
3 significant difference (although  $p$  values were not reported) in contagious illness reporting  
4  
5 between those in single occupant cells of 4.5 and/or 5.6m<sup>2</sup> per person (0.03 reports per week)  
6  
7 and those in dormitories with a spatial density of 4.6 and/or 5.5m<sup>2</sup> (0.06 reports per week) per  
8  
9 person. As the reported cell spatial area range of these two cell types are nearly identical, this  
10  
11 is likely to say more about the effect of social density (the number of individuals per cell) or  
12  
13 cell type (dormitories versus singles) than it does on cell spatial density.  
14  
15

16  
17 The second US' study from this research, examined cell spatial density in single  
18  
19 occupancy cells alone in two federal prisons.<sup>49</sup> Using multiple linear regression analysis  
20  
21 statistically significant effects were reported in only one of the prisons. However, for  
22  
23 contagious illness, the cell spatial density variable was reported as not significant ( $p=0.88$ ).  
24  
25 However, the validity and reliability of the outcome measure used is questionable as the  
26  
27 measure may capture other parameters of health service use besides health effects.  
28  
29  
30  
31  
32  
33  
34  
35  
36  
37  
38  
39  
40  
41  
42  
43  
44  
45  
46  
47  
48  
49  
50  
51  
52  
53  
54  
55  
56  
57  
58  
59  
60

Table 3. Characteristics and quality assessment of included studies

| Author                        | Year of publication | Country study was conducted | Type of study, sample size, gender    | Outcome                       | Exposure characteristics                                         | Effect size/measure (aOR or p value)                                           | Overall quality and capacity to determine if cell spatial density is associated with outcome†                                                                |
|-------------------------------|---------------------|-----------------------------|---------------------------------------|-------------------------------|------------------------------------------------------------------|--------------------------------------------------------------------------------|--------------------------------------------------------------------------------------------------------------------------------------------------------------|
|                               |                     |                             |                                       |                               | Cell spatial density values analysed (m <sup>2</sup> per person) | Cell design type                                                               |                                                                                                                                                              |
| Hussain et al. <sup>45</sup>  | 2003                | Pakistan                    | Cross-sectional study, 425, 100% male | Mycobacterium tuberculosis    | >5.6 vs ≤5.6                                                     | Barracks (term not defined and may refer to single &/or multiple person cells) | <b>aOR 2.6; 95%CI 1.6, 4.3</b><br><b>Fair</b><br>Medium to high risk of:<br>• exposure misclassification<br>• confounding<br>Potential for:<br>• recall bias |
| Aguilera et al. <sup>48</sup> | 2016                | Chile                       | Cross-sectional study, 418, 77% male  | Latent tuberculosis infection | Unclear if continuous or dichotomised variable used.             | Not reported                                                                   | <b>aOR 3.5; 95%CI: 1.1, 11.5)</b><br><b>Fair</b><br>Medium to high risk of:<br>• exposure misclassification<br>Potential for:<br>• recall bias               |
| Hoge et al. <sup>44</sup>     | 1989                | United States of America    | Cohort study, 46, 92% male            | Pneumococcal disease          | 2.9 vs (4.2 & 2.6);                                              | Single vs (4-person & dormitory)                                               | <b>aOR 2.0; 95%CI 1.1, 3.8</b><br><b>Poor to fair</b><br>Medium to high risk of:                                                                             |

1  
2  
3  
4  
5  
6  
7  
8  
9  
10  
11  
12  
13  
14  
15  
16  
17  
18  
19  
20  
21  
22  
23  
24  
25  
26  
27  
28  
29  
30  
31  
32  
33  
34  
35  
36  
37  
38  
39  
40  
41  
42  
43  
44  
45  
46

|                                |      |         |                                      |                                          |                           |                                                |                 |                                                                                                                                                                                                                                                                                                                                                                                                                                                                                                           |
|--------------------------------|------|---------|--------------------------------------|------------------------------------------|---------------------------|------------------------------------------------|-----------------|-----------------------------------------------------------------------------------------------------------------------------------------------------------------------------------------------------------------------------------------------------------------------------------------------------------------------------------------------------------------------------------------------------------------------------------------------------------------------------------------------------------|
| Oninla & Onayemi <sup>46</sup> | 2012 | Nigeria | Cross-sectional study, 305, 97% male | Infectious dermatoses                    | 13.0 vs (2.9, 4.2 & 2.6); | Single vs (single, 4-person & dormitory)       | <i>p</i> <0.001 | <ul style="list-style-type: none"> <li>• exposure misclassification</li> <li>• associations due to chance</li> </ul> Potential for: <ul style="list-style-type: none"> <li>• recall bias</li> <li>• confounding</li> </ul> <b>Poor</b> High risk of: <ul style="list-style-type: none"> <li>• associations due to chance</li> <li>• confounding</li> <li>• selection bias</li> </ul> Potential for: <ul style="list-style-type: none"> <li>• recall bias</li> <li>• exposure misclassification</li> </ul> |
|                                |      |         |                                      |                                          | 6.8 vs (2.9, 4.2 & 2.6)   | Not reported vs (single, 4-person & dormitory) | <i>p</i> <0.001 |                                                                                                                                                                                                                                                                                                                                                                                                                                                                                                           |
|                                |      |         |                                      |                                          | 0.9 vs 2.4                | Single vs dormitories                          | <i>p</i> =0.03  |                                                                                                                                                                                                                                                                                                                                                                                                                                                                                                           |
| Oninla et al. <sup>47</sup>    | 2013 | Nigeria | Cross-sectional study, 305, 97% male | Infectious and non-infectious dermatoses | 0.9 vs 2.4                | Single vs dormitories                          | <i>p</i> <0.001 | <b>Poor</b> High risk of: <ul style="list-style-type: none"> <li>• associations due to chance</li> <li>• confounding</li> <li>• selection bias</li> </ul> Potential for: <ul style="list-style-type: none"> <li>• recall bias</li> </ul>                                                                                                                                                                                                                                                                  |

|    |                             |      |                          |                                       |                                        |                    |                                         |                  |                                                                                                                                                                                                                                                                                                                                                                                      |
|----|-----------------------------|------|--------------------------|---------------------------------------|----------------------------------------|--------------------|-----------------------------------------|------------------|--------------------------------------------------------------------------------------------------------------------------------------------------------------------------------------------------------------------------------------------------------------------------------------------------------------------------------------------------------------------------------------|
| 1  |                             |      |                          |                                       |                                        |                    |                                         |                  |                                                                                                                                                                                                                                                                                                                                                                                      |
| 2  |                             |      |                          |                                       |                                        |                    |                                         |                  |                                                                                                                                                                                                                                                                                                                                                                                      |
| 3  |                             |      |                          |                                       |                                        |                    |                                         |                  |                                                                                                                                                                                                                                                                                                                                                                                      |
| 4  |                             |      |                          |                                       |                                        |                    |                                         |                  |                                                                                                                                                                                                                                                                                                                                                                                      |
| 5  |                             |      |                          |                                       |                                        |                    |                                         |                  |                                                                                                                                                                                                                                                                                                                                                                                      |
| 6  |                             |      |                          |                                       |                                        |                    |                                         |                  |                                                                                                                                                                                                                                                                                                                                                                                      |
| 7  | McCain et al. <sup>37</sup> | 1980 | United States of America | Cross-sectional study, 289, 100% male | Contagious illness reporting at clinic | 4.5/5.6 vs 4.6/5.5 | Singles/singles vs cubicles/dormitories | <b>p&lt;0.05</b> | <ul style="list-style-type: none"> <li>• exposure misclassification</li> </ul> <p><b>Fair</b><br/>Medium to high risk of:</p> <ul style="list-style-type: none"> <li>• outcome misclassification</li> </ul> <p>Potential for:</p> <ul style="list-style-type: none"> <li>• associations by chance</li> <li>• confounding</li> <li>• recall bias</li> <li>• selection bias</li> </ul> |
| 8  |                             |      |                          |                                       |                                        |                    |                                         |                  |                                                                                                                                                                                                                                                                                                                                                                                      |
| 9  |                             |      |                          |                                       |                                        |                    |                                         |                  |                                                                                                                                                                                                                                                                                                                                                                                      |
| 10 |                             |      |                          |                                       |                                        |                    |                                         |                  |                                                                                                                                                                                                                                                                                                                                                                                      |
| 11 |                             |      |                          |                                       |                                        |                    |                                         |                  |                                                                                                                                                                                                                                                                                                                                                                                      |
| 12 |                             |      |                          |                                       |                                        |                    |                                         |                  |                                                                                                                                                                                                                                                                                                                                                                                      |
| 13 |                             |      |                          |                                       |                                        |                    |                                         |                  |                                                                                                                                                                                                                                                                                                                                                                                      |
| 14 |                             |      |                          |                                       |                                        |                    |                                         |                  |                                                                                                                                                                                                                                                                                                                                                                                      |
| 15 |                             |      |                          |                                       |                                        |                    |                                         |                  |                                                                                                                                                                                                                                                                                                                                                                                      |
| 16 |                             |      |                          |                                       |                                        |                    |                                         |                  |                                                                                                                                                                                                                                                                                                                                                                                      |
| 17 |                             |      |                          |                                       |                                        |                    |                                         |                  |                                                                                                                                                                                                                                                                                                                                                                                      |
| 18 |                             |      |                          |                                       |                                        |                    |                                         |                  |                                                                                                                                                                                                                                                                                                                                                                                      |
| 19 |                             |      |                          |                                       |                                        |                    |                                         |                  |                                                                                                                                                                                                                                                                                                                                                                                      |
| 20 |                             |      |                          |                                       |                                        |                    |                                         |                  |                                                                                                                                                                                                                                                                                                                                                                                      |
| 21 |                             |      |                          |                                       |                                        |                    |                                         |                  |                                                                                                                                                                                                                                                                                                                                                                                      |
| 22 | Gaes <sup>49</sup>          | 1982 | United States of America | Cross-sectional study, 352, 100% male | Contagious illness reporting at clinic | 4.0 to 8.2         | Singles and cubicles                    | ns               | <p><b>Poor to fair</b><br/>Medium to high risk of:</p> <ul style="list-style-type: none"> <li>• outcome misclassification</li> </ul> <p>Potential for:</p> <ul style="list-style-type: none"> <li>• confounding</li> <li>• selection bias</li> </ul>                                                                                                                                 |
| 23 |                             |      |                          |                                       |                                        |                    |                                         |                  |                                                                                                                                                                                                                                                                                                                                                                                      |
| 24 |                             |      |                          |                                       |                                        |                    |                                         |                  |                                                                                                                                                                                                                                                                                                                                                                                      |
| 25 |                             |      |                          |                                       |                                        |                    |                                         |                  |                                                                                                                                                                                                                                                                                                                                                                                      |
| 26 |                             |      |                          |                                       |                                        |                    |                                         |                  |                                                                                                                                                                                                                                                                                                                                                                                      |
| 27 |                             |      |                          |                                       |                                        |                    |                                         |                  |                                                                                                                                                                                                                                                                                                                                                                                      |
| 28 |                             |      |                          |                                       |                                        |                    |                                         |                  |                                                                                                                                                                                                                                                                                                                                                                                      |
| 29 |                             |      |                          |                                       |                                        |                    |                                         |                  |                                                                                                                                                                                                                                                                                                                                                                                      |
| 30 |                             |      |                          |                                       |                                        |                    |                                         |                  |                                                                                                                                                                                                                                                                                                                                                                                      |
| 31 |                             |      |                          |                                       |                                        |                    |                                         |                  |                                                                                                                                                                                                                                                                                                                                                                                      |
| 32 |                             |      |                          |                                       |                                        |                    |                                         |                  |                                                                                                                                                                                                                                                                                                                                                                                      |
| 33 |                             |      |                          |                                       |                                        |                    |                                         |                  |                                                                                                                                                                                                                                                                                                                                                                                      |

**Bold** = statistical significance  
 ns = not statistically significant  
 † Assessment guided by the NHMRC’s checklist to critically appraise aetiology or risk factor studies.<sup>42</sup> Checklist items used to guide the assessment included: exposure misclassification; outcome misclassification; selection bias; confounding; and chance.

## Discussion

Despite the attention that prison crowding receives, this review identified only seven articles examining cell spatial density and infectious and communicable diseases. While the methodological approach adopted in this review ensured that that the largest number of peer-reviewed and grey literature publications were identified, some studies and outcomes may have been missed due to publication and outcome reporting bias. Some journals may be more likely to publish studies that report statistically significant results and overlook studies that are not consistent with previously published studies, present ‘negative data’ that disproves the investigators' hypothesis, as well results that could be interpreted to be of little interest or relevance to their readership.<sup>50</sup> Due to the difficulty in located study protocols, assessment of selective reporting of outcomes was not conducted. Thus, outcome reporting bias may also be present.

The identified seven studies were conducted with mostly male prisoner populations in the US, Pakistan, Chile and Nigeria. Infectious and communicable disease outcomes reported included pneumococcal disease, MTB, LBTI, skin conditions, and prisoner reporting of communicable illness to the prison clinic. Six were cross-sectional studies and one was a combined case-control and cohort study.

Overall, the evidence concerning the association between prison cell spatial density and infectious and communicable disease effects was given a rating of ‘C’ on the NHMRC Evidence Rating Scale (ranging from ‘A’ to ‘D’) indicating that “*the body of evidence provides some support for an association between cell spatial density and infectious and communicable diseases but care should be taken in the interpretation of the findings*”.<sup>41</sup> The review found that there was mostly consistent evidence that cell spatial density is associated with clinically verifiable infectious and communicable diseases. Although five of the seven studies reported a statistically significant positive association between cell spatial density and infectious and



1  
2  
3 communicable disease effects (one additional study reporting a significant association  
4 regarding the effect of social density or cell type rather than cell spatial density), the quality of  
5 the studies was assessed as poor due to risk of exposure/outcome misclassification, bias, chance  
6 and/or confounding. However, the Pakistan study on MTB<sup>45</sup> and the Chile Study on LBTI<sup>48</sup>  
7 adjusted for potential confounders and chance.  
8  
9

10  
11  
12  
13  
14  
15 The cross-sectional design of six of these studies means the ability to assess causality  
16 is limited in that they were carried out at one given point in time and provide no indication of  
17 the sequence of events. As such, it remains unclear whether cell spatial density exposure  
18 preceded or followed the onset of infectious or communicable diseases reported in these  
19 studies. However, one study provided some evidence that a number of infections occurred  
20 inside prisons following a repeat testing performed at eight weeks after baseline, suggesting  
21 cell spatial density exposure contributed to these new infections.<sup>48</sup> The associations and  
22 statistical precision observed in the articles suggest the possibility of a 'slight' health impact  
23 of cell spatial density on prisoners in regard to infectious diseases. However, it is possible that  
24 these associations are due to confounding, bias and/or chance. In addition, differences between  
25 the populations examined in these studies were apparent in terms of socio-cultural  
26 demographics, institutional settings and practices, and the background prevalence of infectious  
27 and communicable diseases outcomes in the respective countries (US, Nigeria, Pakistan,  
28 Chile). Studies were also conducted in different decades. These apparent differences restrict  
29 the generalisability and transferability of the observed effects to correctional contexts outside  
30 the countries where the reviewed studies were conducted.  
31  
32  
33  
34  
35  
36  
37  
38  
39  
40  
41  
42  
43  
44  
45  
46  
47  
48  
49

### 50 51 ***Implications for researchers and policy makers*** 52

53  
54 Further research is needed that addresses the confounding, bias and chance elements in  
55 studies examined by this review. We recommend that future studies include clinically verifiable  
56 health outcomes to ensure outcome misclassification is prevented or minimised and include  
57  
58  
59  
60

1  
2  
3 adequate detail on how cell floor spatial density was determined to facilitate a clear assessment  
4  
5 of exposure misclassification.  
6  
7

8 In most articles reviewed, inadequate attempts were made to adjust for personal  
9  
10 characteristics of prisoners and/or prison-related factors as potential confounders. This  
11  
12 statement acknowledges that cell spatial density, as an objective condition of crowding, is  
13  
14 likely to be embedded in a complex interplay of psychological, social, cultural and institutional  
15  
16 factors, and that variations of any health effects cannot be fully understood without their  
17  
18 consideration. Thus, future research should seek to collect more extensive data on prospective  
19  
20 confounding and mediating factors to examine how such factors interact with cell spatial  
21  
22 density and health effects. To assist this, we reviewed the twelve eligible articles identified in  
23  
24 this review (seven) and the mental health and wellbeing review (five),<sup>39</sup> in addition to key  
25  
26 international reports on prisoner conditions, prison crowding and prisoner health to identify  
27  
28 what factors might mediate the association between prison cell spatial density and adverse  
29  
30 health effects.<sup>51</sup> From this review we recommend that future research on cell spatial density  
31  
32 and health effects consider the following factors: (i) personal characteristics of prisoners such  
33  
34 as age, education level, gender, ethnicity, underlying medical conditions, and health risk  
35  
36 behaviours (e.g. current intravenous drug use); (ii) physical environment measures such as air  
37  
38 ventilation and privacy afforded to the prisoner; and (iii) social and policy environment of  
39  
40 prison such as time confined in cell per day, cell allocation policy and practice, health service  
41  
42 access, length of incarceration and custody and security classification of prisoner.<sup>51</sup>  
43  
44  
45  
46  
47  
48

49 Although the body of evidence assessed indicated cautious support for the association  
50  
51 between prison cell spatial density and infectious and communicable diseases, we do not  
52  
53 advocate increasing social and spatial density and there is likely to be reasonable grounds for  
54  
55 policy responses to address prison crowding in the absence of scientific certainty. As one US'  
56  
57 Court of Appeals<sup>52</sup> ruling stated:  
58  
59  
60

1  
2  
3 *Undoubtedly, certainty is the scientific ideal - to the extent that even science*  
4 *can be certain of its truth. But certainty in the complexities of environmental*  
5 *medicine may be achievable only after the fact, when scientists have the*  
6 *opportunity for leisurely and isolated scrutiny of an entire mechanism.*  
7  
8 *Awaiting certainty will often allow for only reactive, not preventive regulation.*  
9  
10  
11  
12  
13

14 In the absence of scientific certainty, international standards and recommendations provide  
15 guidance by way of mitigating prison and prison cell crowding and any potential infectious and  
16 communicable disease effects this may bring. The International Red Cross Association (ICPA)  
17 handbook on *Water, Sanitation, Hygiene and Habitat in Prisons* recognises that any technical  
18 focus on prisons to address potential adverse health effects, such as cell spatial density, cannot  
19 be separated from addressing other factors that mediate prisoner health and wellbeing.<sup>17</sup> Some  
20 ICPA guidelines and recommendations are feasible in terms of implementation in the short  
21 term to address immediate need (e.g. access to health care and sanitary facilities and extending  
22 time 'out-of-cell' to participate in meaningful activities). A public health approach to  
23 addressing any adverse health effects associated with prison cell crowding should include  
24 prevention strategies ranging from the micro- to the macro-level. The United Nations' Office  
25 of Drugs and Crime *Handbook on Strategies to Reduce Overcrowding in Prisons*<sup>13</sup>  
26 acknowledges that to address the health effects associated with crowding, 'decarceration'  
27 strategies to prevent prison crowding occurring in the first instance is required. Decarceration  
28 strategies involve processes that remove people from prisons and prevent them from  
29 (re)entering prison. This is likely to be a longer-term strategy that will require extensive work  
30 involving multiple agencies from different sectors, and changes in political and societal  
31 attitudes to incarceration.  
32  
33  
34  
35  
36  
37  
38  
39  
40  
41  
42  
43  
44  
45  
46  
47  
48  
49  
50  
51  
52  
53  
54  
55  
56  
57  
58  
59  
60

## Contributions

PLS is the guarantor. PLS, MS, AA and TGB drafted the manuscript. All authors contributed to the development of the selection criteria. PLS, MS and TGB contributed to the risk of bias assessment strategy, data extraction templates and developed the search strategies. All authors read, provided feedback and approved the final manuscript.

## Acknowledgements

We would like to acknowledge Advisory Panel members Professor Wayne Smith and Dr Benjamin Scalley of the New South Wales Ministry of Health; Garry Forrest and Denise Monkley of the Justice Health and Forensic Mental Health Network; and Janaya Ho of Corrective Services New South Wales. We would also like to acknowledge the independent peer-review undertaken by Associate Professor Jeffrey Post, and Dr Lorraine Yap and Marina Talevski with respect to their contributions to this review.

## Ethics

Ethics approval was not required. Please see 'Ethical approval for literature reviews and meta-analyses' on the UNSW Sydney Research Ethics & Compliance Support Frequently Asked Questions (FAQs) page (<https://research.unsw.edu.au/frequently-asked-questions-faqs>).

## Transparency declaration

The lead author affirms that this manuscript is an honest, accurate, and transparent account of the study/review being reported; that no important aspects of the study/review have been omitted; and that any discrepancies from the study/review as planned have been explained.

## Funding

Under the direction of the New South Wales Ministry of Health, the New South Wales Department of Justice funded this review. To ensure appropriate management of perceived or potential conflicts of interest, the expert advisory panel that was formed to guide the review

1  
2  
3 comprised of diverse stakeholders, including medical practitioners, infectious diseases  
4  
5 experts, public health professionals, a custodial administrator and academic staff. Author and  
6  
7 custodial administrator LG, who although contributed to the scope of the search criteria and  
8  
9 provided feedback and approval of the final manuscript, did not contribute to data extraction,  
10  
11 confounder, bias and chance assessment, aggregated evidence appraisal and ratings and the  
12  
13 interpretation of findings.  
14  
15

### 16 17 **Competing interest statement**

18  
19 There was grant support from the New South Wales Department of Justice during the conduct  
20  
21 of the study. There are no financial relationships with any other organisations that might have  
22  
23 an interest in the submitted work in the previous three years. Author LG is a custodial  
24  
25 administrator LG and could give the appearance of potentially influencing findings. Although  
26  
27 LG contributed to the scope of the search criteria and provided feedback and approval of the  
28  
29 final manuscript, he did not contribute to data extraction, confounder, bias and chance  
30  
31 assessment, aggregated evidence appraisal and ratings and the interpretation of findings. At  
32  
33 the time of the review MS was employed as a research associate of the Kirby Institute,  
34  
35 University of New South Wales, Sydney.  
36  
37  
38  
39

### 40 41 **Data sharing statement**

42  
43 No additional data available.  
44  
45  
46  
47  
48  
49  
50  
51  
52  
53  
54  
55  
56  
57  
58  
59  
60

## References

1. United Nations. World Population Prospects: The 2018 Revision. In: United Nations, Department of Economic and Social Affairs, Population Division, editor. New York; 2018. <https://esa.un.org/unpd/wup/Download/>
2. Huber A, Rope O, Sheahan S. *Global Prison Trends 2017*. London: Penal Reform International, 2017.
3. Walmsley R. *World Prison Population List, 12th Edition*: Institute for Criminal Policy Research, 2018.
4. New South Wales Department of Justice Inspector of Custodial Services. *The Growth of the Inmate Population in NSW*. Sydney: NSW Government, 2015.
5. Walker B, Gordon T. Health and high-density confinement in jails and prisons. *Federal Probation* 1980; 44: 53-7.
6. Walker B. Prison population pressures: The epidemiological basis for present density standards. *Journal of Environmental Health* 1991; 54(2): 18-20.
7. European Centre for Disease Prevention and Control. *Systematic Review on Active Case Finding of Communicable Diseases in Prison Settings*. Stockholm: European Centre for Disease Prevention and Control and the European Monitoring Centre for Drugs and Drug Addiction, 2017.
8. New York State Commission of Correction. *Examination of Density and Crowding in Correctional Facilities and their Applicability to the Question of Double-Celling*. New York, USA: New York State Commission of Correction, 1981.
9. UNAIDS. *UNAIDS Technical Update Prisons and AIDS Geneva*: Joint United Nations Programme on HIV/AIDS, 1997.

10. Gaes GG. Effects of Overcrowding in Prison In: Tonry M, Morris N, eds. *Crime and Justice Volume 6: An Annual Review of Research*. Chicago, USA: The University of Chicago Press; 1985.
11. Paulus PB. *Prison Crowding: A Psychological Perspective*. New York: Springer-Verlag 1988.
12. Cox VC, Paulus PB, McCain G. Prison Crowding Research: The relevance for prison housing standards and a general approach regarding crowding phenomena. *American Psychologist* 1984; 39(10): 1148-60.
13. United Nations Office on Drugs and Crime. *Handbook on Strategies to Reduce overcrowding in Prisons*. Vienna: United Nations Office on Drugs and Crime, 2010.
14. United Nations Office on Drugs and Crime. *The United Nations Standard Minimum Rules for the Treatment of Prisoners ('the Mandela Rules')*. Geneva: United Nations, 2015.
15. European Committee for the Prevention of Torture and Inhuman or Degrading Treatment or Punishment. *European Committee for the Prevention of Torture and Inhuman or Degrading Treatment or Punishment (CPT): CPT Standards*. Strasbourg Cedex, France: Council of Europe, 2015.
16. International Committee of the Red Cross. *Review of Space Accommodation Standards in Prison Cells*. Geneva: International Committee of the Red Cross, 2014.
17. International Committee of the Red Cross. *Water, Sanitation, Hygiene and Habitat in Prisons: Supplementary Guidance*. Geneva, Switzerland: International Committee of the Red Cross, 2012.
18. Farmer PE, Kononets AS, Borisov SE, Goldfarb A, Healing T, McKee M. Recrudescence tuberculosis in the Russian Federation. In: Farmer PE, Reichman LB, Iseman MD, eds.

- 1  
2  
3 *The Global Impact of Drug Resistant Tuberculosis*. Boston, MA: Harvard Medical  
4 School/Open Society Institute; 1999.  
5  
6  
7  
8 19. Greifinger RB. Inmates as public health sentinels prison reform: Commission on Safety  
9 and Abuse in America's Prisons. *Journal of Law and Policy* 2006; 22: 253-64.  
10  
11  
12 20. Shilova MV, Dye C. The resurgence of tuberculosis in Russia. *Philosophical*  
13 *Transactions of the Royal Society of London Biological Sciences* 2001; 29: 1069-75.  
14  
15  
16 21. Stern V. *The Problems of TB in Prisons in Eastern Europe and Central Asia*. London:  
17 International Centre for Prison Studies, 1999.  
18  
19  
20 22. Zulficar GR. Public Health Implications of Substandard Correctional Health Care.  
21 *American Journal of Public Health* 2005; 95(10): 1689-91.  
22  
23  
24 23. Gaes GG. Prison crowding research re-examined. *Prison Journal* 1994; 74(3): 329-63.  
25  
26  
27 24. Ostfeld AM, Kasl SV, D'Atri DA, Fitzgerald EF. *Stress, Crowding, and Blood Pressure*  
28 *in Prison*. New Jersey: Lawrence Erlbaum Associates; 1987.  
29  
30  
31 25. Schmidt DE, Keating JP. Human crowding and personal control: An integration of the  
32 research. *Psychological Bulletin* 1979; 86(4): 680-700.  
33  
34  
35 26. Stokols D. Environmental Psychology. *Annual Review of Psychology* 1978; 29(1): 253-  
36 95.  
37  
38  
39 27. McCorkle RC, Miethe TD, Drass KA. The roots of prison violence: a test of the  
40 deprivation, management, and "not-so-total" institution models. *Crime and*  
41 *Delinquency* 1995; 41(3): 317-31.  
42  
43  
44 28. Tartaro C. The impact of density on jail violence. *Journal of Criminal Justice* 2002;  
45 30(6): 499-510.  
46  
47  
48 29. Anson RH. Overcrowding and Inmate Fatalities. *International Journal of Comparative*  
49 *and Applied Criminal Justice* 1984; 8(1-2): 93-100.  
50  
51  
52  
53  
54  
55  
56  
57  
58  
59  
60



- 1  
2  
3 30. Bonta J, Kiem T. Institutional misconducts in a jail setting: Preliminary findings and a  
4 note of caution. *Crime and Justice* 1978; 6: 175-8.  
5  
6  
7 31. Ruback RB. Crowding in a Woman's Prison - Attitudinal and Behavioral Effects.  
8 *Journal of Applied Social Psychology* 1984; 14(1): 57-68.  
9  
10  
11 32. Atlas R. Violence in Prison - Architectural Determinism. Florida State University,  
12 1982.  
13  
14  
15 33. Urrego J, Ko AI, da Silva Santos Carbone A, et al. The impact of ventilation and early  
16 diagnosis on tuberculosis transmission in Brazilian prisons. *The American Journal of*  
17 *Tropical Medicine and Hygiene* 2015; 93(4): 739-46.  
18  
19  
20 34. Ekland-Olson S, Barrick DM, Cohen LE. Prison overcrowding and disciplinary  
21 problems: An analysis of the Texas prison system. *The Journal of Applied Behavioral*  
22 *Science* 1983; 19: 163-76.  
23  
24  
25 35. Megargee EI. The association of population density, reduced space, and uncomfortable  
26 temperatures with misconduct in a prison community. *American Journal of Community*  
27 *Psychology* 1977; 5(3): 289-98.  
28  
29  
30 36. McCain G, Cox V, Paulus P. Relationship between illness complaints and degree of  
31 crowding in a prison environment. *Environment and Behavior* 1976; 8(1): 283-90.  
32  
33  
34 37. McCain G, Cox VC, Paulus PB. *The Effect of Prison Crowding on Inmate Behavior*.  
35 Washington DC: National Institute of Justice; 1980.  
36  
37  
38 38. Moher D, Liberati A, Tetzlaff J, Altman DG. Preferred reporting items for systematic  
39 reviews and meta-analyses: the PRISMA statement. *International Journal of Surgery*  
40 2010; 8: 336-41. doi:10.1136/bmj.b2535  
41  
42  
43 39 Simpson PL, Simpson M, Butler T. *Prison Cell Size and Adverse Health Effects: A*  
44 *Systematic Review*. Sydney: The Kirby Institute, UNSW Australia and Corrective  
45 Services NSW. (ISBN-10: 0-7334-3615-3; ISBN-13: 978-0-7334-3615-4). 2016.  
46  
47  
48  
49  
50  
51  
52  
53  
54  
55  
56  
57  
58  
59  
60

- 1  
2  
3 40 Porta M, ed. A dictionary of epidemiology. 6th ed. New York: Oxford University Press,  
4  
5 2014.  
6  
7  
8 41 National Health and Medical Research Council. *NHMRC Additional Levels of Evidence*  
9  
10 *and Grades for Recommendations for Developers of Guidelines*. Canberra, ACT,  
11  
12 Australia: National Health and Medical Research Council, 2009.  
13  
14  
15 42 National Health and Medical Research Council. *NHMRC Standards and Procedures*  
16  
17 *for Externally Developed Guidelines*. Canberra, ACT, Australia.: National Health and  
18  
19 Medical Research Council, 2007.  
20  
21  
22 43 National Health and Medical Research Council. *How to Review the Evidence:*  
23  
24 *Systematic Identification and Review of the Scientific Literature*. Canberra: National  
25  
26 Health and Medical Research Council, 2000.  
27  
28  
29 44 Hoge CW, Reichler MR, Dominguez EA, et al. An epidemic of pneumococcal disease  
30  
31 in an overcrowded, inadequately ventilated jail. *The New England Journal of Medicine*  
32  
33 1994; 331(10): 643-8.  
34  
35  
36 45 Hussain H, Akhtar S, Nanan D. Prevalence of and risk factors associated with  
37  
38 Mycobacterium tuberculosis infection in prisoners, North West Frontier Province,  
39  
40 Pakistan. *International Journal Epidemiology* 2003; 32(5): 794-9.  
41  
42  
43 46 Oninla OA, Onayemi O. Skin infections and infestations in prison inmates.  
44  
45 *International Journal Dermatology* 2012; 51(2): 178-81.  
46  
47  
48 47 Oninla OA, Onayemi O, Olasode OA, Oninla SO. Pattern of dermatoses among inmates  
49  
50 of Ilesha Prison, Nigeria. *The Nigerian Postgraduate Medical Journal* 2013; 20(3):  
51  
52 174-80.  
53  
54  
55 48 Aguilera XP, González C, Nájera-De Ferrari M, Hirmas M, Delgado I, Olea A, Lezaeta  
56  
57 L, Montaña A, González P, Hormazábal JC, Fernández J, García C, Herrera T.  
58  
59 Tuberculosis in prisoners and their contacts in Chile: estimating incidence and latent  
60

1  
2  
3 infection. *International Journal of Tuberculosis and Lung Disease* 2016; 20(1): 63-70.  
4  
5 doi: 10.5588/ijtld.15.0056.  
6

7  
8 49 Gaes GG. *The effect of Spatial and Architectural Housing Variations on Acute Inmate*  
9  
10 *Morbidity Indicators*. Unpublished manuscript. Washington DC: Office of Research,  
11  
12 Federal Prison System, 1982.  
13

14  
15 50 DeVito NJ, Goldacre B. Catalogue of bias: publication bias *BMJ Evidence-Based*  
16  
17 *Medicine* 2019; 24: 53-54.  
18

19  
20 51 Simpson PL, Simpson M, Butler T. *Prison cell size and adverse health effects: potential*  
21  
22 *mediating factors*, The Kirby Institute, UNSW Australia, Sydney, and Corrective  
23  
24 Services NSW, Sydney, 2016, (ISBN-13: 978-0-7334-3617-8).  
25

26  
27 52 United States Court of Appeals. *Eighth Annual Report on the Council of Environmental*  
28  
29 *Quality*. Washington D.C., 1977.  
30  
31  
32  
33  
34  
35  
36  
37  
38  
39  
40  
41  
42  
43  
44  
45  
46  
47  
48  
49  
50  
51  
52  
53  
54  
55  
56  
57  
58  
59  
60

1  
2  
3 Figure 1. Flow chart for selection of articles  
4  
5  
6  
7  
8  
9  
10  
11  
12  
13  
14  
15  
16  
17  
18  
19  
20  
21  
22  
23  
24  
25  
26  
27  
28  
29  
30  
31  
32  
33  
34  
35  
36  
37  
38  
39  
40  
41  
42  
43  
44  
45  
46  
47  
48  
49  
50  
51  
52  
53  
54  
55  
56  
57  
58  
59  
60

For peer review only

1  
2  
3  
4  
5  
6  
7  
8  
9  
10  
11  
12  
13  
14  
15  
16  
17  
18  
19  
20  
21  
22  
23  
24  
25  
26  
27  
28  
29  
30  
31  
32  
33  
34  
35  
36  
37  
38  
39  
40  
41  
42  
43  
44  
45  
46

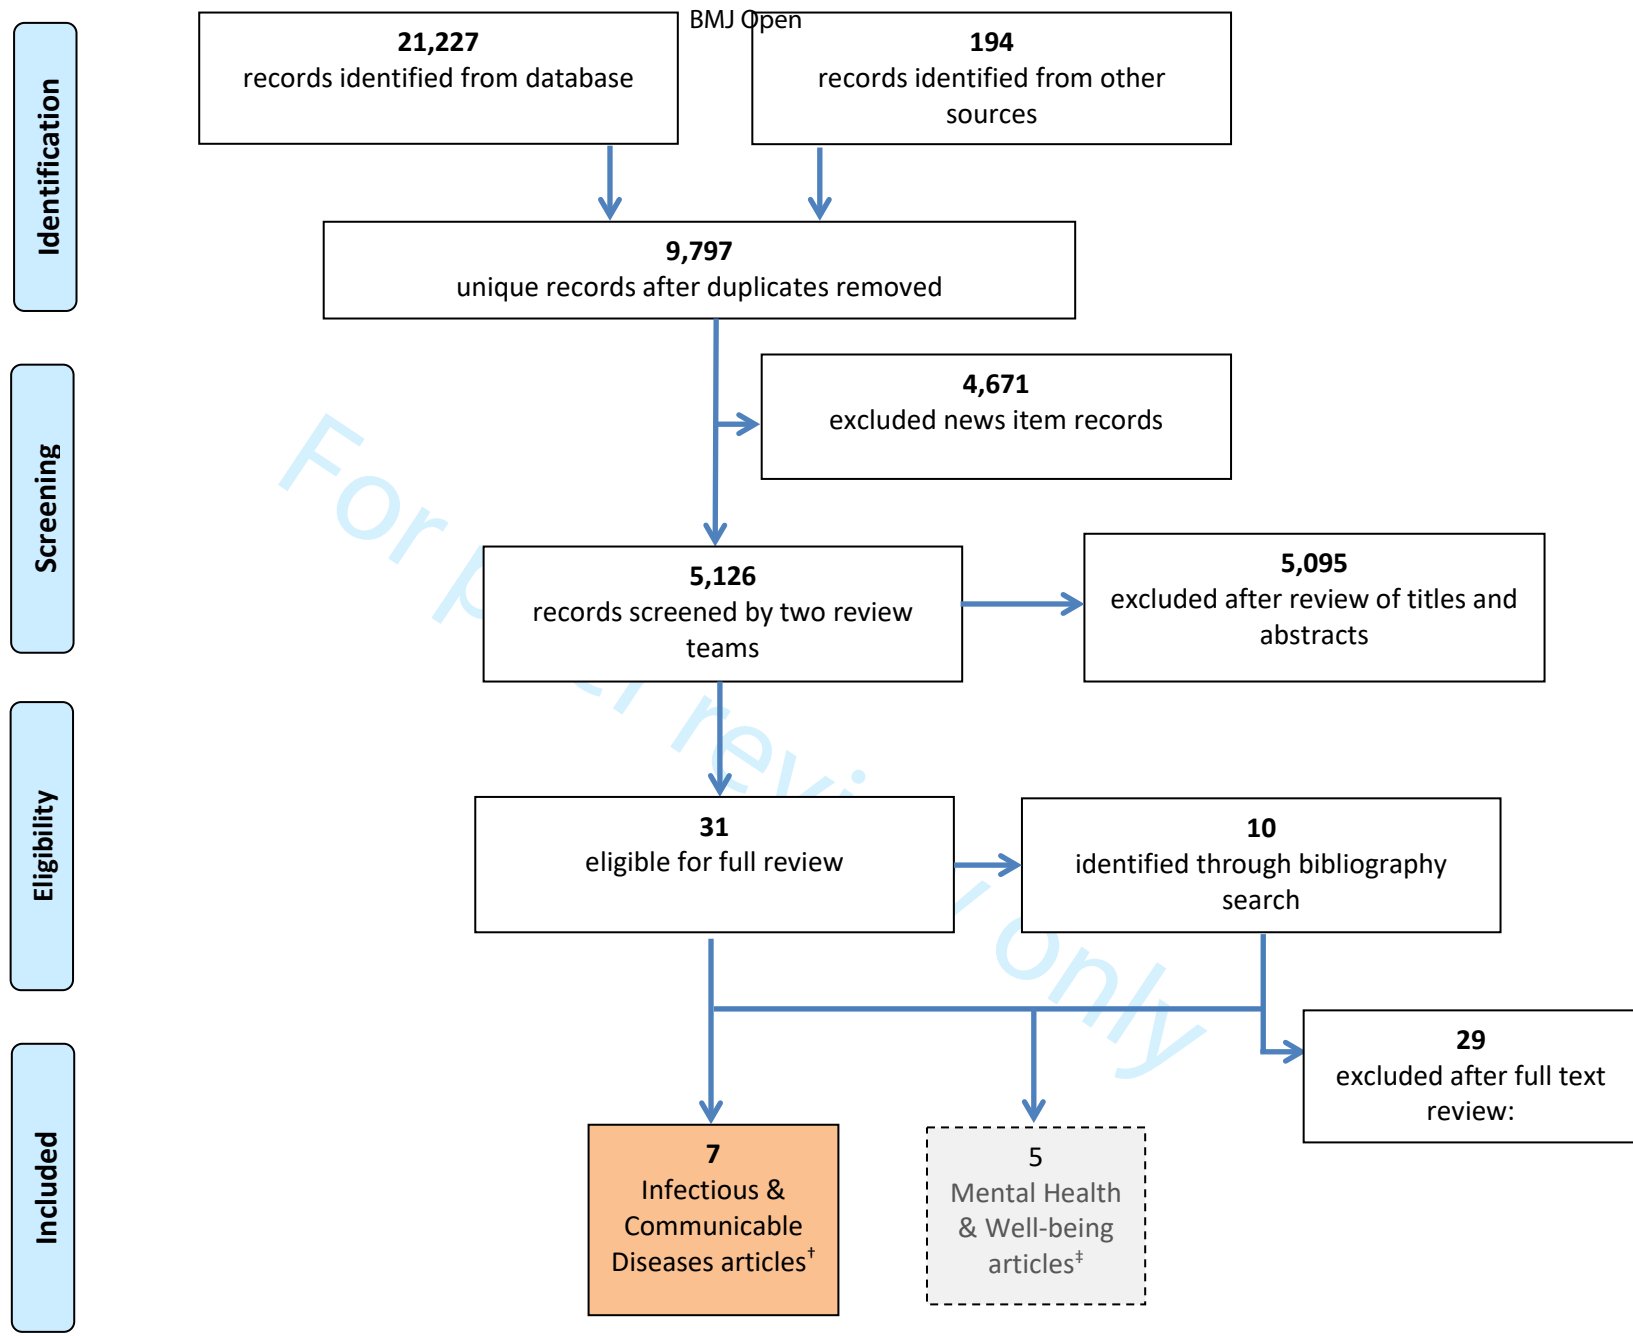

† Articles included for review

‡ Review of mental health and wellbeing articles reported elsewhere<sup>29</sup>

## Appendix A

### Components of the Body of Evidence Statement Form used in the review

| Component                                                                                                                                                                                                                                                                                                       | A                                                                                                       | B                                                                                                                           | C                                                                                                                               | D                                                                                                              |
|-----------------------------------------------------------------------------------------------------------------------------------------------------------------------------------------------------------------------------------------------------------------------------------------------------------------|---------------------------------------------------------------------------------------------------------|-----------------------------------------------------------------------------------------------------------------------------|---------------------------------------------------------------------------------------------------------------------------------|----------------------------------------------------------------------------------------------------------------|
|                                                                                                                                                                                                                                                                                                                 | Excellent                                                                                               | Good                                                                                                                        | Satisfactory                                                                                                                    | Poor                                                                                                           |
| Evidence base <sup>1</sup>                                                                                                                                                                                                                                                                                      | One of more level I studies with a low risk of bias or several level II studies with a low risk of bias | One or two level II studies with a low risk of bias or SR/several level III studies with a low risk of bias and confounding | One or two level III studies with a low risk of bias or level I or level II studies with a moderate risk of bias or confounding | Level IV studies or level III studies/SRs with a risk of bias and confounding                                  |
| Consistency                                                                                                                                                                                                                                                                                                     | All studies consistent                                                                                  | Most studies consistent and inconsistency can be explained                                                                  | Some inconsistency, reflecting genuine uncertainty around question                                                              | Evidence is inconsistent                                                                                       |
| Population health impact                                                                                                                                                                                                                                                                                        | Very large                                                                                              | Moderate                                                                                                                    | Slight                                                                                                                          | Restricted                                                                                                     |
| Generalisability                                                                                                                                                                                                                                                                                                | Evidence directly generalisable to target population                                                    | Evidence directly generalisable to target population with some caveats                                                      | Evidence not directly generalisable to the target population but could be sensibly applied                                      | Evidence not directly generalisable to the target population and hard to judge whether it is sensible to apply |
| <sup>1</sup> Evidence base level: systematic review of prospective cohort studies (level I), prospective cohort study (level II), 'all or none' study (level III-1) retrospective cohort study (level III-2), case-control study (level III-3), cross-sectional study, or case series (level IV). <sup>31</sup> |                                                                                                         |                                                                                                                             |                                                                                                                                 |                                                                                                                |

Source: NHMRC<sup>31</sup>

**Appendix B**Evidence Scale and Statement recommendations

| Evidence statement rating | Description                                                                                               |
|---------------------------|-----------------------------------------------------------------------------------------------------------|
| A                         | Findings from the body of evidence can be trusted                                                         |
| B                         | Findings from the body of evidence can be trusted in most situations                                      |
| C                         | The body of evidence provides some support but care should be taken in the interpretation of the findings |
| D                         | The body of evidence is weak and findings cannot be trusted                                               |

Source: NHMRC<sup>31</sup>

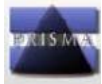

# PRISMA 2009 Checklist

| Section/topic                      | #  | Checklist item                                                                                                                                                                                                                                                                                              | Reported on page # |
|------------------------------------|----|-------------------------------------------------------------------------------------------------------------------------------------------------------------------------------------------------------------------------------------------------------------------------------------------------------------|--------------------|
| <b>TITLE</b>                       |    |                                                                                                                                                                                                                                                                                                             |                    |
| Title                              | 1  | Identify the report as a systematic review, meta-analysis, or both.                                                                                                                                                                                                                                         | 1                  |
| <b>ABSTRACT</b>                    |    |                                                                                                                                                                                                                                                                                                             |                    |
| Structured summary                 | 2  | Provide a structured summary including, as applicable: background; objectives; data sources; study eligibility criteria, participants, and interventions; study appraisal and synthesis methods; results; limitations; conclusions and implications of key findings; systematic review registration number. | 1                  |
| <b>INTRODUCTION</b>                |    |                                                                                                                                                                                                                                                                                                             |                    |
| Rationale                          | 3  | Describe the rationale for the review in the context of what is already known.                                                                                                                                                                                                                              | 3-4                |
| Objectives                         | 4  | Provide an explicit statement of questions being addressed with reference to participants, interventions, comparisons, outcomes, and study design (PICOS).                                                                                                                                                  | 5                  |
| <b>METHODS</b>                     |    |                                                                                                                                                                                                                                                                                                             |                    |
| Protocol and registration          | 5  | Indicate if a review protocol exists, if and where it can be accessed (e.g., Web address), and, if available, provide registration information including registration number.                                                                                                                               | 6                  |
| Eligibility criteria               | 6  | Specify study characteristics (e.g., PICOS, length of follow-up) and report characteristics (e.g., years considered, language, publication status) used as criteria for eligibility, giving rationale.                                                                                                      | 7                  |
| Information sources                | 7  | Describe all information sources (e.g., databases with dates of coverage, contact with study authors to identify additional studies) in the search and date last searched.                                                                                                                                  | 6-7                |
| Search                             | 8  | Present full electronic search strategy for at least one database, including any limits used, such that it could be repeated.                                                                                                                                                                               | Table 2            |
| Study selection                    | 9  | State the process for selecting studies (i.e., screening, eligibility, included in systematic review, and, if applicable, included in the meta-analysis).                                                                                                                                                   | 7-8                |
| Data collection process            | 10 | Describe method of data extraction from reports (e.g., piloted forms, independently, in duplicate) and any processes for obtaining and confirming data from investigators.                                                                                                                                  | 8                  |
| Data items                         | 11 | List and define all variables for which data were sought (e.g., PICOS, funding sources) and any assumptions and simplifications made.                                                                                                                                                                       | 6, 8               |
| Risk of bias in individual studies | 12 | Describe methods used for assessing risk of bias of individual studies (including specification of whether this was done at the study or outcome level), and how this information is to be used in any data synthesis.                                                                                      | 8-9                |
| Summary measures                   | 13 | State the principal summary measures (e.g., risk ratio, difference in means).                                                                                                                                                                                                                               | 9                  |
| Synthesis of results               | 14 | Describe the methods of handling data and combining results of studies, if done, including measures of consistency (e.g., $I^2$ ) for each meta-analysis.                                                                                                                                                   | N/A                |



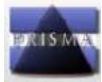

# PRISMA 2009 Checklist

Page 1 of 2

| Section/topic                 | #  | Checklist item                                                                                                                                                                                           | Reported on page # |
|-------------------------------|----|----------------------------------------------------------------------------------------------------------------------------------------------------------------------------------------------------------|--------------------|
| Risk of bias across studies   | 15 | Specify any assessment of risk of bias that may affect the cumulative evidence (e.g., publication bias, selective reporting within studies).                                                             | 13                 |
| Additional analyses           | 16 | Describe methods of additional analyses (e.g., sensitivity or subgroup analyses, meta-regression), if done, indicating which were pre-specified.                                                         | N/A                |
| <b>RESULTS</b>                |    |                                                                                                                                                                                                          |                    |
| Study selection               | 17 | Give numbers of studies screened, assessed for eligibility, and included in the review, with reasons for exclusions at each stage, ideally with a flow diagram.                                          | 9 & Figure 1       |
| Study characteristics         | 18 | For each study, present characteristics for which data were extracted (e.g., study size, PICOS, follow-up period) and provide the citations.                                                             | Table 3            |
| Risk of bias within studies   | 19 | Present data on risk of bias of each study and, if available, any outcome level assessment (see item 12).                                                                                                | Table 3            |
| Results of individual studies | 20 | For all outcomes considered (benefits or harms), present, for each study: (a) simple summary data for each intervention group (b) effect estimates and confidence intervals, ideally with a forest plot. | Table 3            |
| Synthesis of results          | 21 | Present results of each meta-analysis done, including confidence intervals and measures of consistency.                                                                                                  | N/A                |
| Risk of bias across studies   | 22 | Present results of any assessment of risk of bias across studies (see Item 15).                                                                                                                          | 13-14              |
| Additional analysis           | 23 | Give results of additional analyses, if done (e.g., sensitivity or subgroup analyses, meta-regression [see Item 16]).                                                                                    | N/A                |
| <b>DISCUSSION</b>             |    |                                                                                                                                                                                                          |                    |
| Summary of evidence           | 24 | Summarize the main findings including the strength of evidence for each main outcome; consider their relevance to key groups (e.g., healthcare providers, users, and policy makers).                     | 14-15              |
| Limitations                   | 25 | Discuss limitations at study and outcome level (e.g., risk of bias), and at review-level (e.g., incomplete retrieval of identified research, reporting bias).                                            | 13                 |
| Conclusions                   | 26 | Provide a general interpretation of the results in the context of other evidence, and implications for future research.                                                                                  | 14-16              |
| <b>FUNDING</b>                |    |                                                                                                                                                                                                          |                    |
| Funding                       | 27 | Describe sources of funding for the systematic review and other support (e.g., supply of data); role of funders for the systematic review.                                                               | 17-18              |

From: Moher D, Liberati A, Tetzlaff J, Altman DG, The PRISMA Group (2009). Preferred Reporting Items for Systematic Reviews and Meta-Analyses: The PRISMA Statement. PLoS Med 6(7): e1000097. doi:10.1371/journal.pmed1000097

For more information, visit: [www.prisma-statement.org](http://www.prisma-statement.org).

Page 2 of 2  
For peer review only - <http://bmjopen.bmj.com/site/about/guidelines.xhtml>
