# Supplementary material for: Prison cell spatial density and infectious and communicable diseases: a systematic review
Source: PubMed Central journal article supplement — BMJ Open. 2019 Jul 23;9(7):e026806. doi: 10.1136/bmjopen-2018-026806 (PMC6661645; doi:10.1136/bmjopen-2018-026806), 2019-07-23
Supplement: bmjopen-2018-026806supp001.pdf [file bmjopen-2018-026806supp001.pdf]

## Appendix A

### Components of the Body of Evidence Statement Form used in the review

| Component                                                                                                                                                                                                                                                                                                       | A                                                                                                       | B                                                                                                                           | C                                                                                                                               | D                                                                                                              |
|-----------------------------------------------------------------------------------------------------------------------------------------------------------------------------------------------------------------------------------------------------------------------------------------------------------------|---------------------------------------------------------------------------------------------------------|-----------------------------------------------------------------------------------------------------------------------------|---------------------------------------------------------------------------------------------------------------------------------|----------------------------------------------------------------------------------------------------------------|
|                                                                                                                                                                                                                                                                                                                 | Excellent                                                                                               | Good                                                                                                                        | Satisfactory                                                                                                                    | Poor                                                                                                           |
| Evidence base <sup>1</sup>                                                                                                                                                                                                                                                                                      | One of more level I studies with a low risk of bias or several level II studies with a low risk of bias | One or two level II studies with a low risk of bias or SR/several level III studies with a low risk of bias and confounding | One or two level III studies with a low risk of bias or level I or level II studies with a moderate risk of bias or confounding | Level IV studies or level III studies/SRs with a risk of bias and confounding                                  |
| Consistency                                                                                                                                                                                                                                                                                                     | All studies consistent                                                                                  | Most studies consistent and inconsistency can be explained                                                                  | Some inconsistency, reflecting genuine uncertainty around question                                                              | Evidence is inconsistent                                                                                       |
| Population health impact                                                                                                                                                                                                                                                                                        | Very large                                                                                              | Moderate                                                                                                                    | Slight                                                                                                                          | Restricted                                                                                                     |
| Generalisability                                                                                                                                                                                                                                                                                                | Evidence directly generalisable to target population                                                    | Evidence directly generalisable to target population with some caveats                                                      | Evidence not directly generalisable to the target population but could be sensibly applied                                      | Evidence not directly generalisable to the target population and hard to judge whether it is sensible to apply |
| <sup>1</sup> Evidence base level: systematic review of prospective cohort studies (level I), prospective cohort study (level II), 'all or none' study (level III-1) retrospective cohort study (level III-2), case-control study (level III-3), cross-sectional study, or case series (level IV). <sup>31</sup> |                                                                                                         |                                                                                                                             |                                                                                                                                 |                                                                                                                |

Source: NHMRC<sup>31</sup>

## Appendix B

### Evidence Scale and Statement recommendations

| Evidence statement rating | Description                                                                                               |
|---------------------------|-----------------------------------------------------------------------------------------------------------|
| A                         | Findings from the body of evidence can be trusted                                                         |
| B                         | Findings from the body of evidence can be trusted in most situations                                      |
| C                         | The body of evidence provides some support but care should be taken in the interpretation of the findings |
| D                         | The body of evidence is weak and findings cannot be trusted                                               |

Source: NHMRC<sup>31</sup>
